# Supplementary material for: GBF3 transcription factor imparts drought tolerance in Arabidopsis thaliana
Source: PubMed Central journal article supplement (PMC5567290; doi:10.1038/s41598-017-09542-1), 2017-08-22
Supplement: 41598_2017_9542_MOESM1_ESM.pdf [file 41598_2017_9542_MOESM1_ESM.pdf]

**Supplementary figures 1-16**  
**Supplementary tables 1-5**  
**Supplementary methods**

**GBF3 transcription factor imparts drought tolerance in**  
***Arabidopsis thaliana***

Venkategowda Ramegowda<sup>1,2</sup>, Upinder Singh Gill<sup>3</sup>, Palaiyur  
Nanjappan Sivalingam<sup>3, 4</sup>, Aarti Gupta<sup>5</sup>, Chirag Gupta<sup>2</sup>, Geetha  
Govind<sup>1</sup>, Karaba N Nataraja<sup>1</sup>, Andy Pereira<sup>2</sup>, Makarla  
Udayakumar<sup>1</sup>, Kirankumar S Mysore<sup>3, #</sup> and Muthappa Senthil-  
Kumar<sup>1, 3, 5, \*</sup>

<sup>1</sup>Department of Crop Physiology, University of Agricultural Sciences,  
Bengaluru, 560065, India; <sup>2</sup>Department of Crop, Soil and Environmental  
Sciences, University of Arkansas, Fayetteville, USA; <sup>3</sup>Plant Biology Division,  
The Samuel Roberts Noble Foundation, Inc. 2510 Sam Noble Parkway,  
Ardmore, OK 73401, USA; <sup>4</sup>ICAR-Central Institute for Arid Horticulture, Indian  
Council of Agricultural Research, Bikaner 334006, India; <sup>5</sup>National Institute of  
Plant Genome Research, Aruna Asaf Ali Marg, PO Box No. 10531, New Delhi  
110 067, India

\*corresponding author

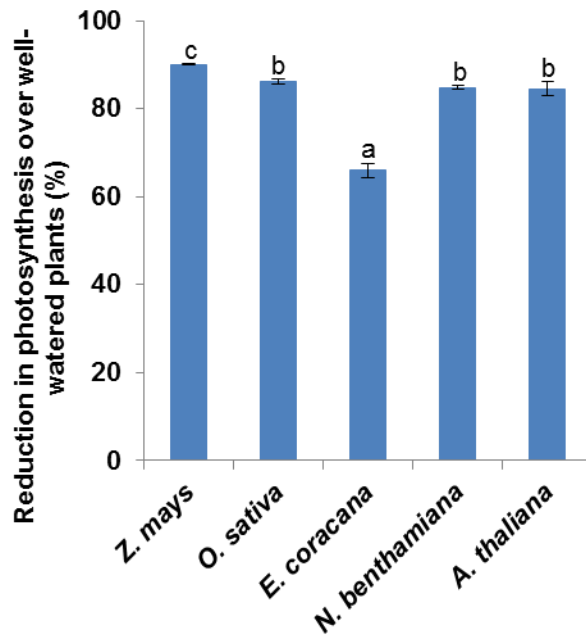

**Fig. S1** Photosynthetic performance of different plants species under drought stress. Drought stress was imposed on 25-day old plants by following gravimetric method (Ramegowda et al. 2012). Plants were weighed daily at 10 am and maintained at 35% field capacity (FC) for five days by replenishing the water lost through evapotranspiration. A set of plants were also maintained at well-watered conditions (100% FC). At the end of stress period, photosynthesis rate was measured on second or third fully expanded leaves from top using a portable photosynthesis system, LI-6400XT (LI-COR Inc., NE, USA) at  $\text{CO}_2$  concentration of  $370 \mu\text{mol mol}^{-1}$ , light intensity of  $1000 \mu\text{mol m}^{-2} \text{s}^{-1}$  and relative humidity of 55-60%. Per cent reduction in photosynthesis rate under drought stress over well-watered plants was calculated. The values are means  $\pm$  SE ( $n=6$ );  $P<0.01$ , one-way ANOVA.

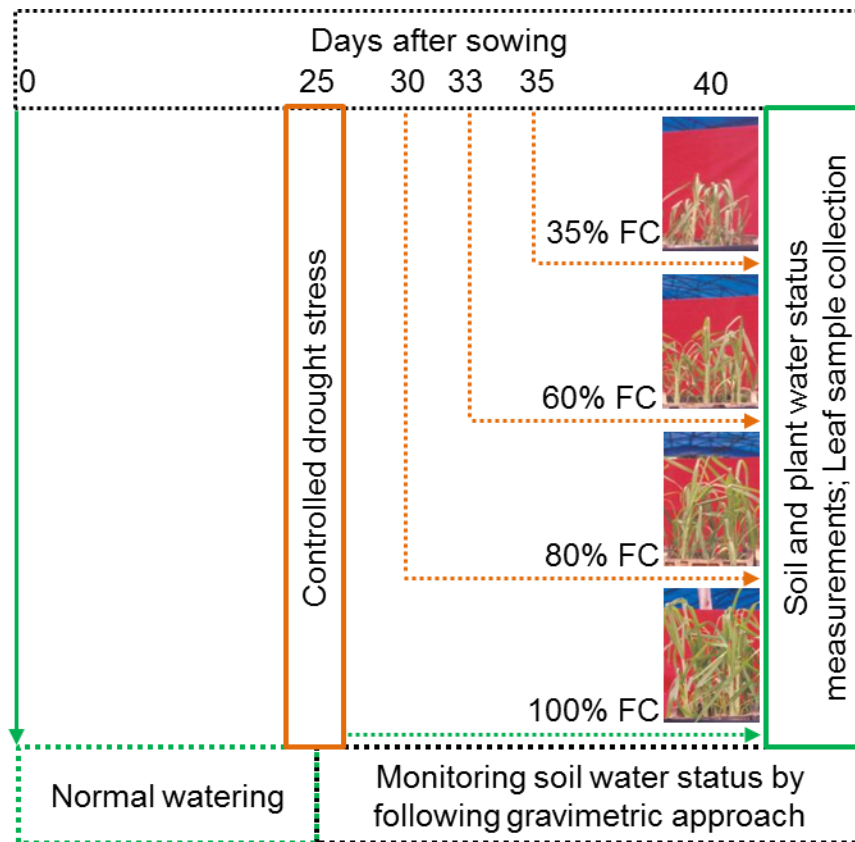

**Fig. S2** Simplified representation of drought stress imposition in finger millet plants following gravimetric approach. Soil moisture status was gradually brought down to 80%, 60% and 35% field capacity (FC) by weighing the pots daily. Plants reaching respective FC's were maintained at that level by replenishing the lost water through evapotranspiration until the other set of plants reaching 35% FC and plants were allowed to acclimate for 5 more days. The inset photographs were taken at the end of stress period at respective FC's before the leaf sample collection for cDNA library construction.

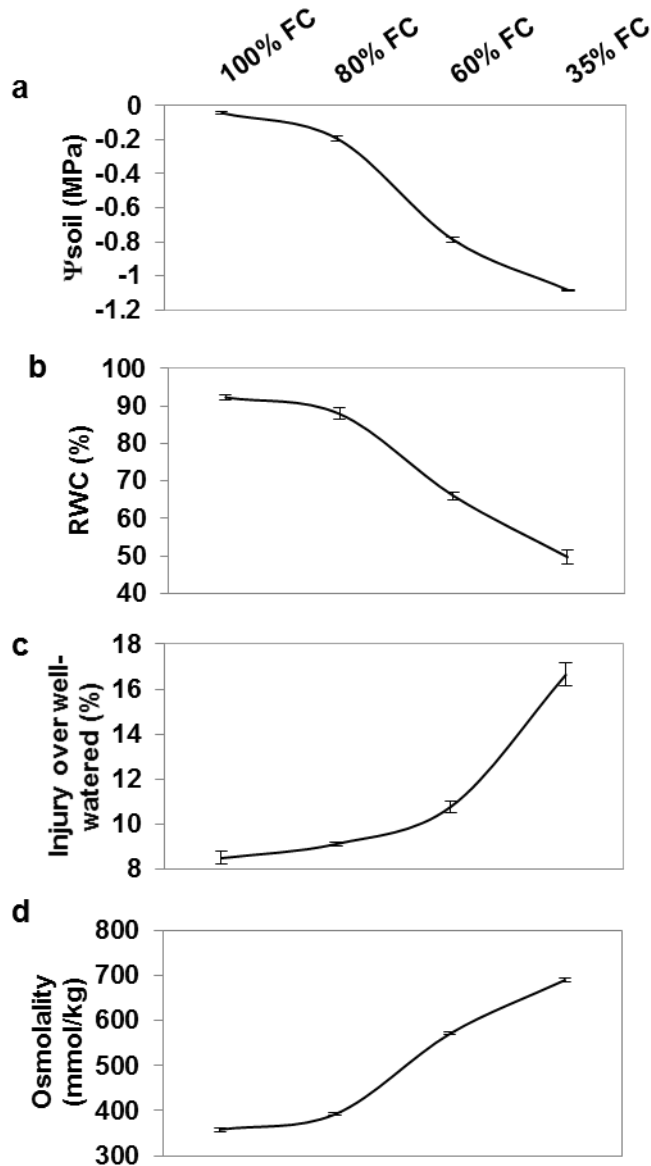

**Fig. S3** Soil and tissue water status at different drought stress levels. Soil sample from the root zone and tissue from top second and third fully expanded leaves were collected at the end of stress period. Soil water potential ( $\Psi_{soil}$ ) (a), Relative water content (b), Cell membrane stability (c) and Osmolality (d) were measured. The values are means  $\pm$  SE (n=5).

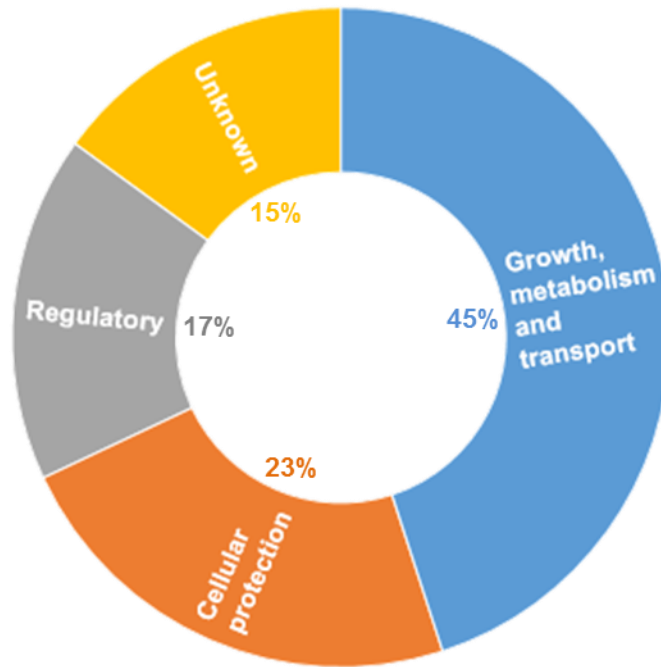

**Fig. S4** Functional classification of ESTs from finger millet subtracted drought stress cDNA library. Homology searches were performed via BLASTx against the NCBI non-redundant (nr) database and putative functions were assigned based on the closest hits. Based on the putative functions ESTs are classified into different functional categories.

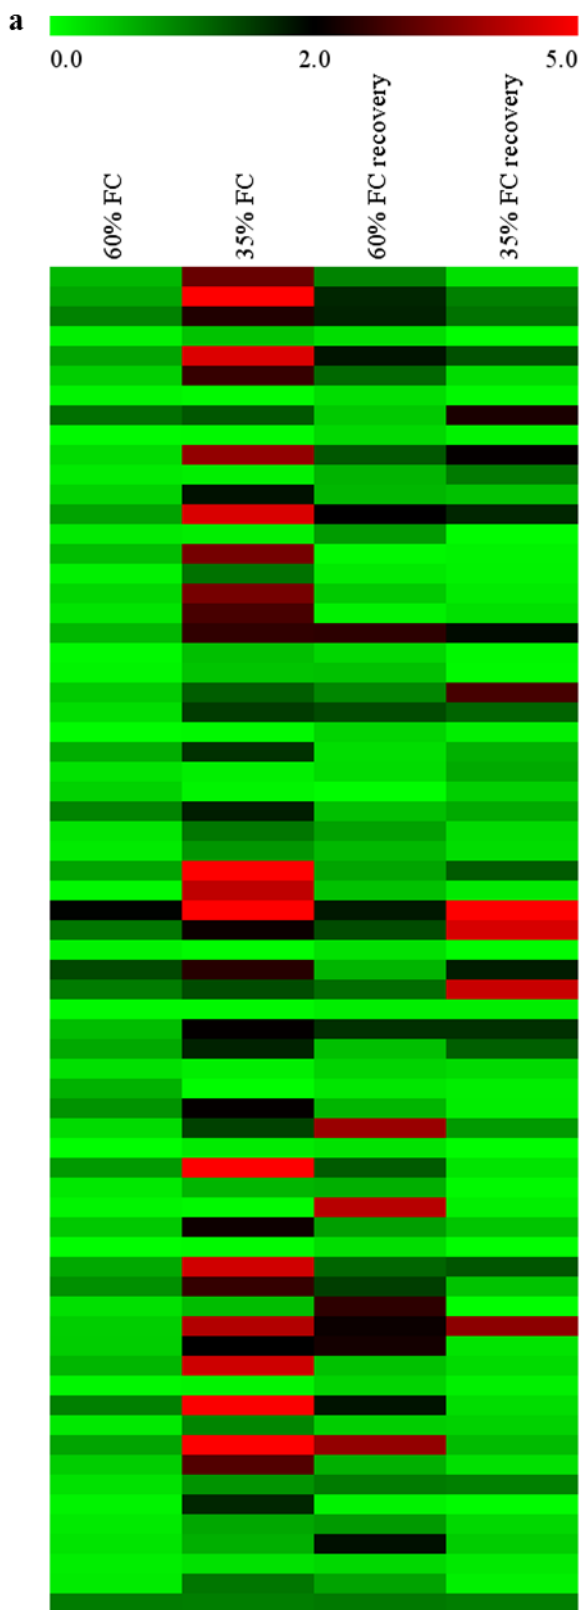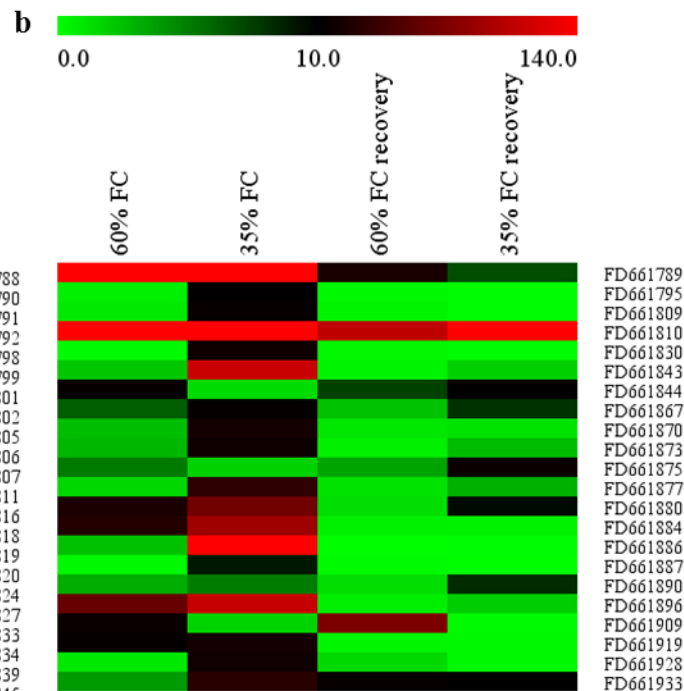

**Fig. S5** Validation of drought stress response of EST's by expression analysis.

Twenty-five days old plants grown under greenhouse conditions were exposed to drought stress by gravimetric approach. At the end of stress period leaf tissue was harvested from drought stressed and well-watered plants. Another set of drought stressed plants were re-watered and tissue was harvested at 6 h of recovery. Total RNA from leaf tissue exposed to different stress levels and recovery were used for RT-qPCR analysis. Expression values were normalized to *EcActin* expression levels and the relative change in transcript levels compared to well-watered condition was converted into heat maps using the TIGR Multiexperiment Viewer (<http://www.tm4.org/mev.html>). ESTs with 0 to 5-fold change (a) and ESTs with 0 to 140-fold change (b) represented as heat maps. The color bars on the top indicate fold change in expression levels under a given condition when compared to well-watered; green for lower expression and red for higher expression.

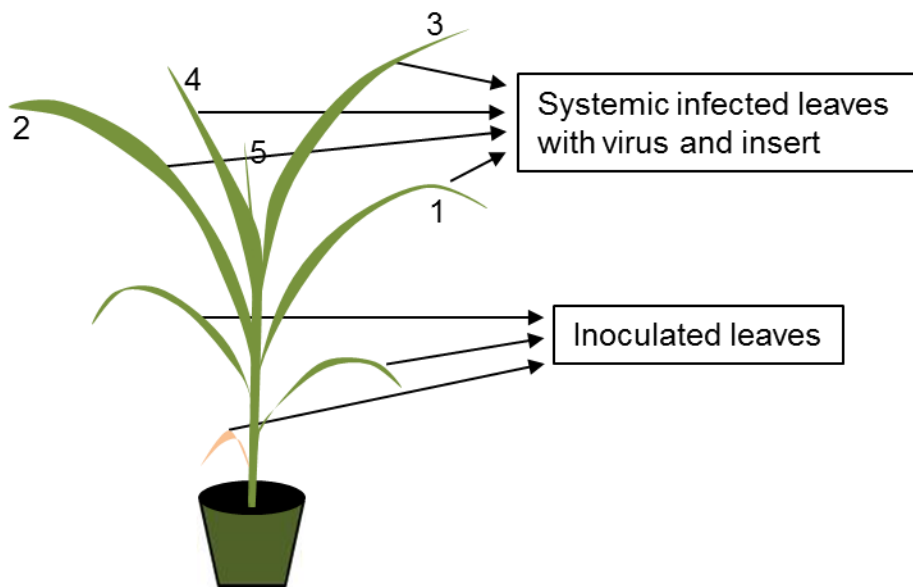

**Fig. S6** Systemic virus-induced gene silencing (VIGS) in maize. BMV vectors carrying the fragments of gene of interest were inoculated on to the first, second and third leaves of six-day-old maize seedlings. At 11 dpi, systemic infection was found in 1-4 newly emerged leaves as analyzed by RT-qPCR for the presence of virus and insert. The third and fourth systemic infected leaves also showed silencing of gene of interest. Fifth leaf showed silencing >80% of the incidences and the degree of silencing was shown to vary as the systemic leaves advance (van der Linde et al. 2011). The third and fourth systemic infected leaves which showed gene silencing were used for physiological and biochemical analysis.

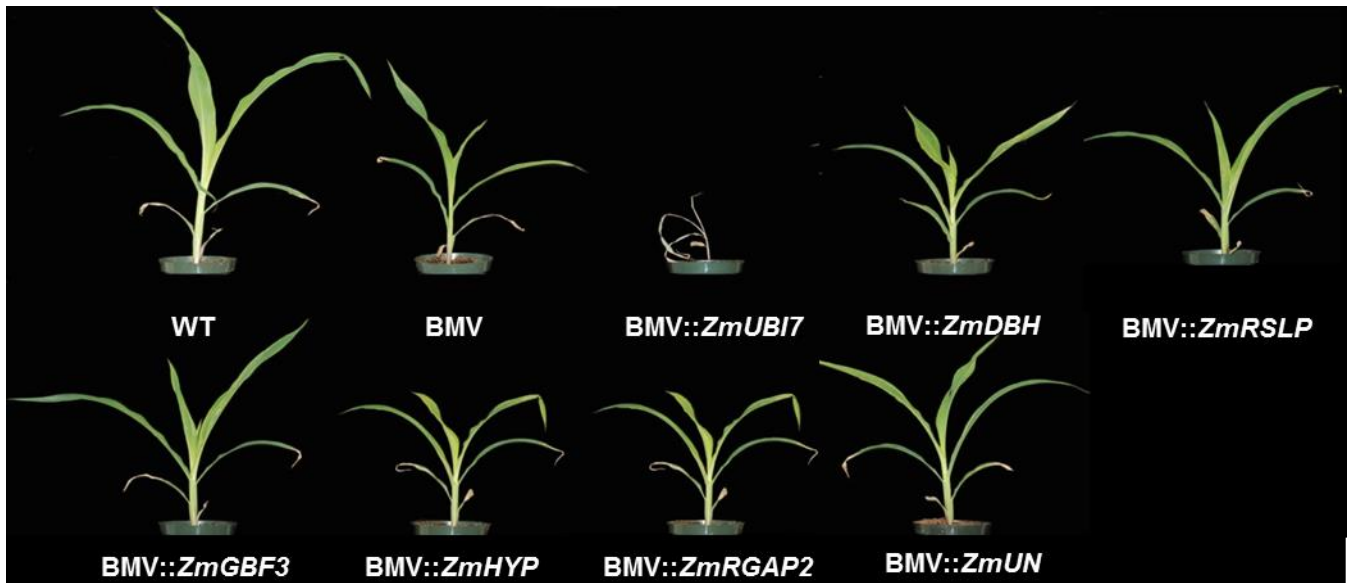

**Fig. S7** Phenotypes of maize plants inoculated with BMV vectors carrying different maize genes. After inoculation plants were grown at normal conditions and photographs were taken at 14 dpi. BMV alone is known to cause only milder virus associated symptoms. In our experiments also some minor effects were observed in BMV vectors only inoculated plants. And hence interpretations on gene silenced plants in our experiments were in comparison to BMV vectors only inoculated plants. Silencing of housekeeping gene *ZmUBI7* resulted in lethal phenotype and hence it was not included in further analysis. WT, non-inoculated; BMV, vector inoculated; all others with BMV:: followed by gene name are respective gene-silenced plants.



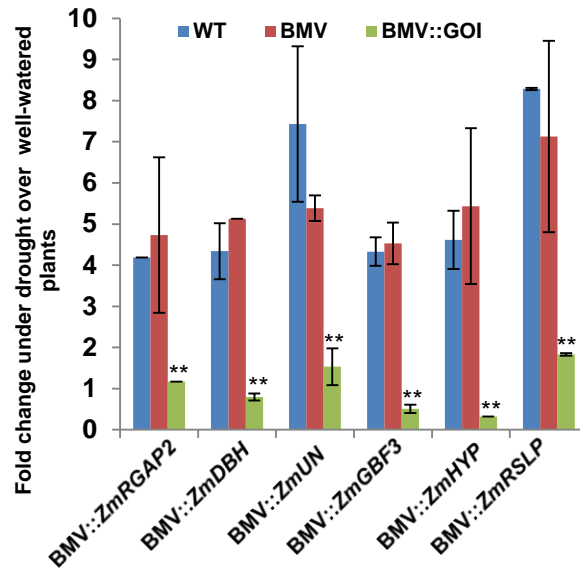

**Fig. S8** Down-regulation of endogenous transcripts in gene silenced maize plants. Drought stress was applied at 14 dpi on all gene-silenced, BMV alone inoculated and WT non-inoculated plants by withholding irrigation for five days. Total RNA from leaf sample was used to analyze endogenous transcript levels of silenced genes in respective gene silenced plants by RT-qPCR. The expression values were normalized to *ZmActin* expression levels and the relative change over control was calculated using  $2^{-\Delta\Delta C_t}$  method. The values are mean  $\pm$  SE of three biological replicates. WT, non-inoculated; BMV, vector inoculated; all others with BMV:: followed by gene name are respective gene-silenced plants. \*\* indicates significant difference from BMV-inoculated plants at  $P \leq 0.01$ .

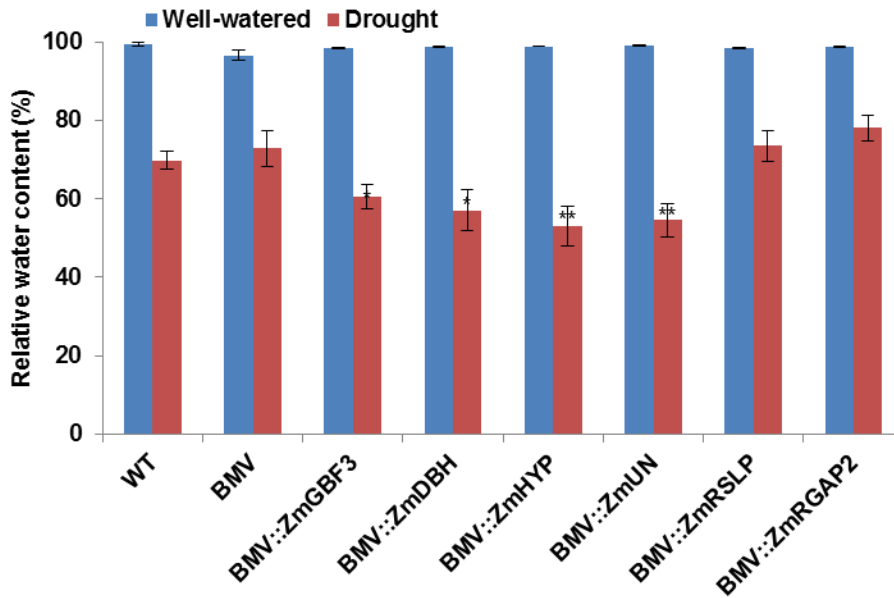

**Fig. S9** Relative water content of silenced plants under drought stress. Drought stress was applied on plants at 14 dpi and relative water content was measured on fifth day. BMV-inoculated plants were used as reference for statistical analysis. The values are means  $\pm$  SE (n=5). \* and \*\* indicate significant differences from BMV-inoculated plants at  $P \leq 0.05$  and  $P \leq 0.01$ , respectively. WT, non-inoculated; BMV, BMV vector inoculated; all others with BMV:: followed by gene name are respective gene silenced plants.

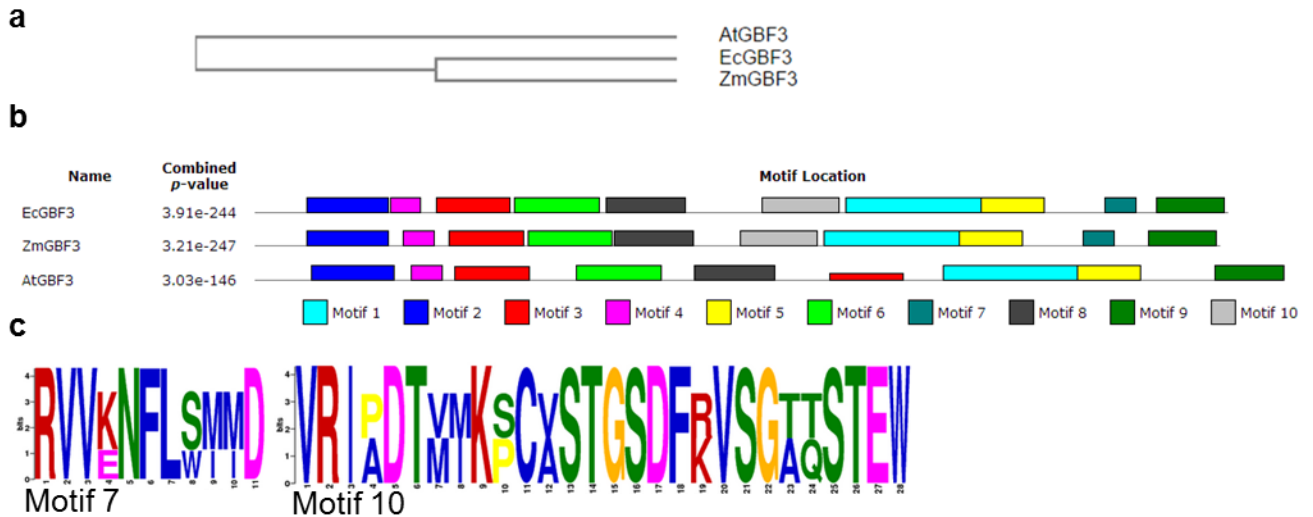

**Fig. S10 Phylogenetic analysis and prediction of putative motifs in EcGBF3 and its orthologs.** The deduced full-length amino acid sequences of EcGBF3, AtGBF3 (At2g46270) and ZmGBF3 (BT063685) were aligned using ClustalW and the phylogenetic tree was constructed using MEGA 4.0 by the Neighbor-Joining (NJ) method (a). Putative motifs were identified using MEME4.9.0 (<http://meme.nbcrl.net/meme/>). Different putative motifs represented as numbered boxes (b). Motif 7 and Motif 10 present only in EcGBF3 and ZmGBF3 (c).

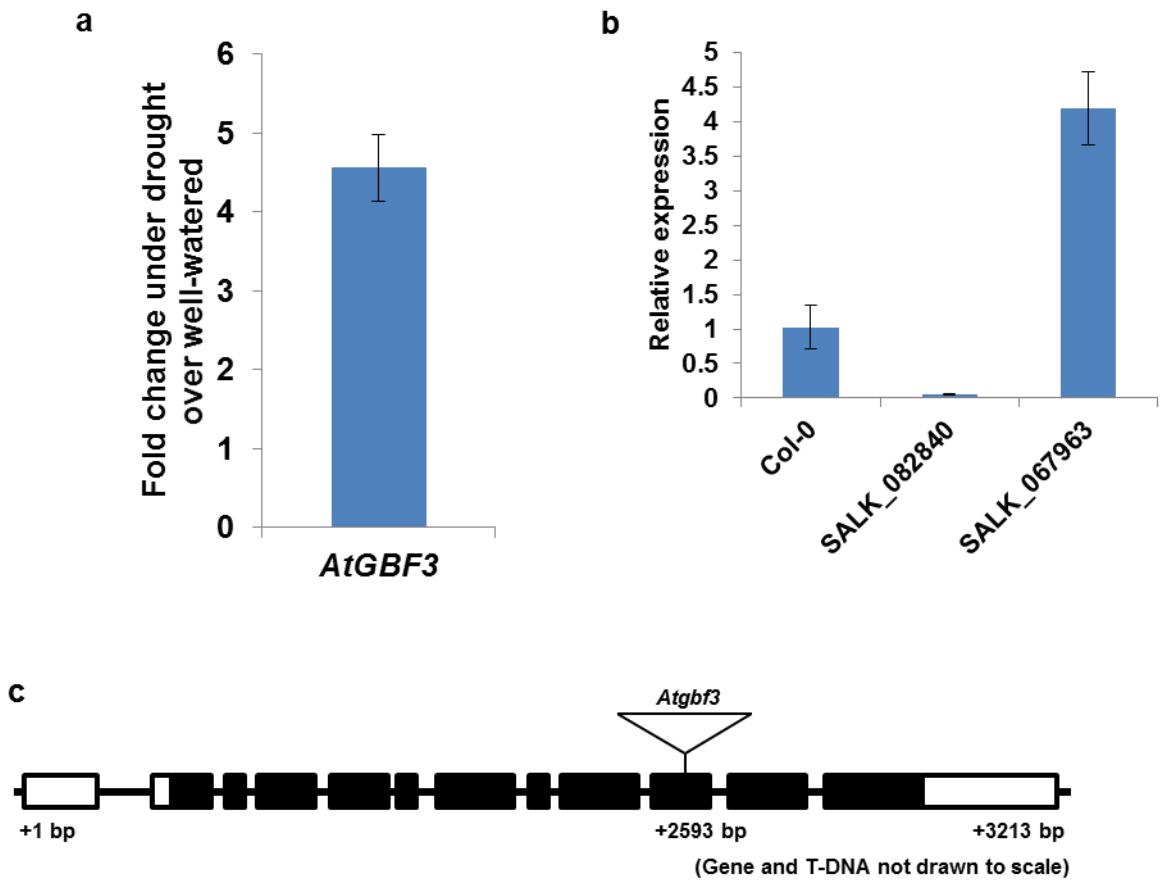

**Fig. S11** Characterization of *AtGBF3* in Arabidopsis. Drought stress was imposed on 14 day old Arabidopsis plants until wilting. RNA from leaf tissue was used for expression analysis of RT-qPCR. Drought induced expression of *AtGBF3* in Arabidopsis (a) was measured. The data was normalized to expression levels of *Elongation factor 1 $\alpha$*  (At5g60390). The relative change over well-watered plants was calculated using  $2^{-\Delta\Delta C_t}$  method. The values are mean  $\pm$  SE of three biological replicates. Relative expression levels of *AtGBF3* in wild-type (Col-0) and mutant plants (b). The relative change in expression was calculated over Col-0. Schematic representation of the T-DNA insertion in *Atgbf3* mutant (SALK\_082840) (c).

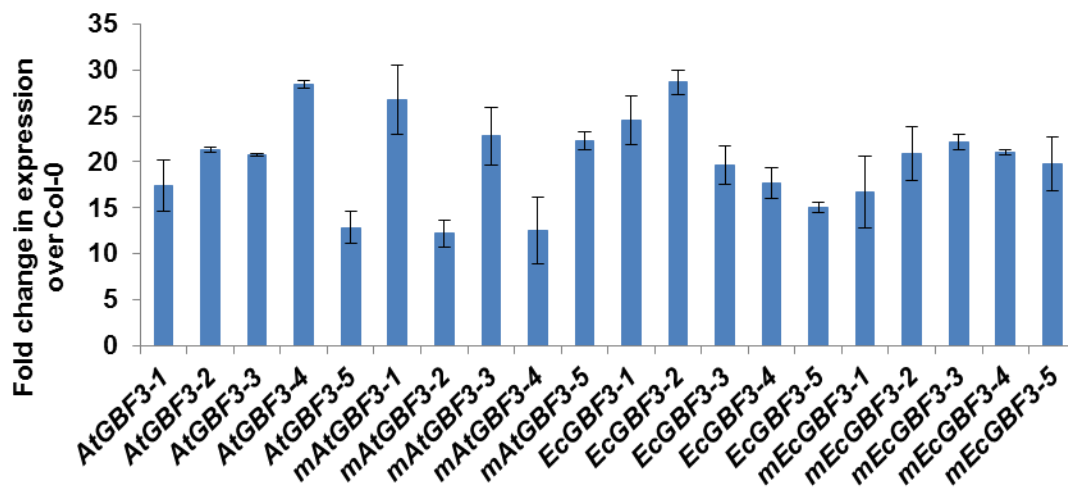

**Fig. S12** Confirmation of transgene expression in Arabidopsis plants by RT-qPCR. Total RNA was isolated from leaves of hygromycin resistant T<sub>2</sub> plants grown under well-watered condition and used for RT-qPCR analysis with specific primers. Non-transformed Col-0 plants were used as controls for calculating the relative expression of *AtGBF3* and *EcGBF3* in transgenic plants. The data was normalized to *Elongation factor 1 $\alpha$*  expression levels and the relative change over Col-0 was calculated. The values are mean  $\pm$  SE (n=3). *AtGBF3*-1 to 5, transgenic lines overexpressing *AtGBF3*; *mAtGBF3*-1 to 5, transgenic lines overexpressing *AtGBF3* in the *Atgbf3* mutant background; *EcGBF3*-1 to 5, transgenic lines overexpressing *EcGBF3*; *mEcGBF3*-1 to 5, transgenic lines overexpressing *EcGBF3* in the *Atgbf3* mutant background.

a

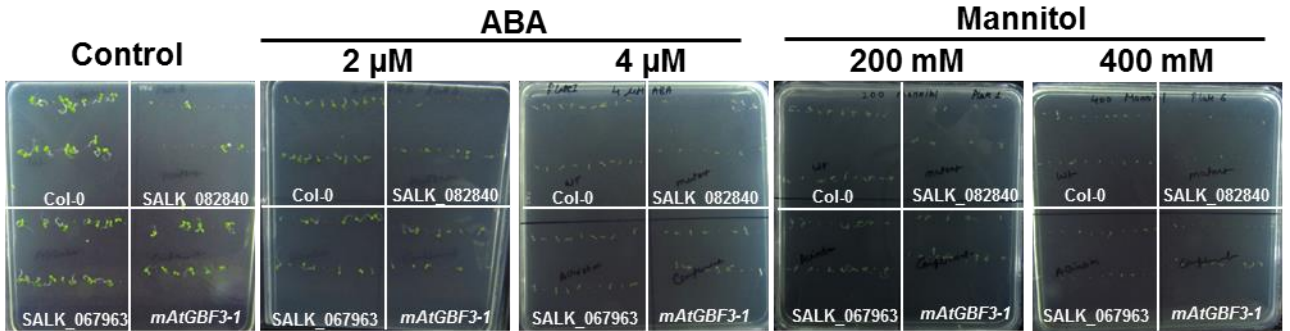

b

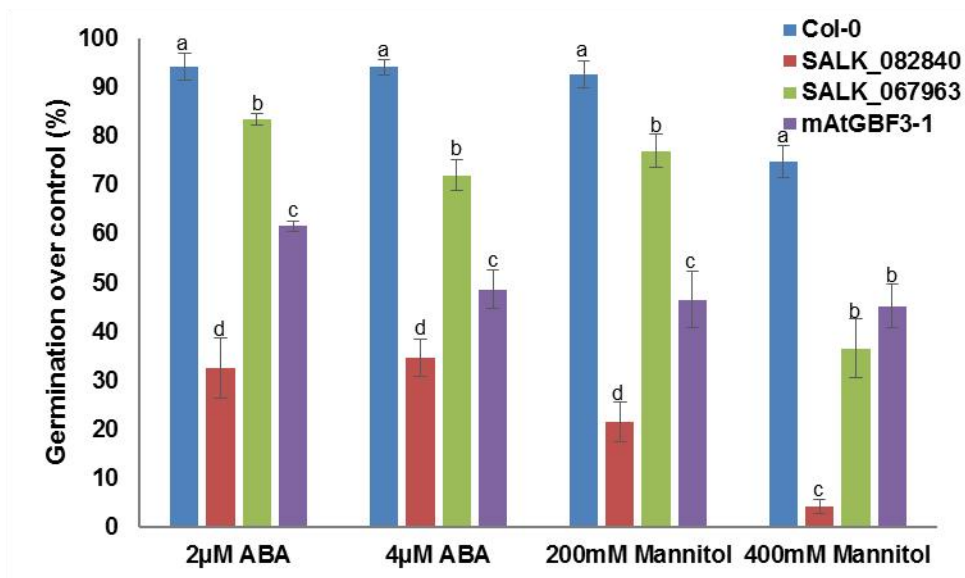

**Fig. S13** Increased germination of *AtGBF3* activation and complementation lines under ABA and mannitol. Surface-sterilized and stratified seeds were sown on MS medium (0.8% agar and 3% sucrose) supplemented with different concentrations of ABA or mannitol. Germination rates were scored daily for seven days from sowing. Photographs were taken seven days after sowing (a). Percent germination in each treatment was calculated over their respective controls (b). The values are means  $\pm$  SE of three independent experiments ( $n=20$ /line/experiment). a, b, c, d indicates that values are significantly different within the group (One-way ANOVA, generalized linear model procedure; SAS software). Col-0, wild type; SALK\_067963, activation line of *AtGBF3*; SALK\_082840, *Atgbf3* mutant; mAtGBF3-1, transgenic line overexpressing *AtGBF3* in the *Atgbf3* mutant background.

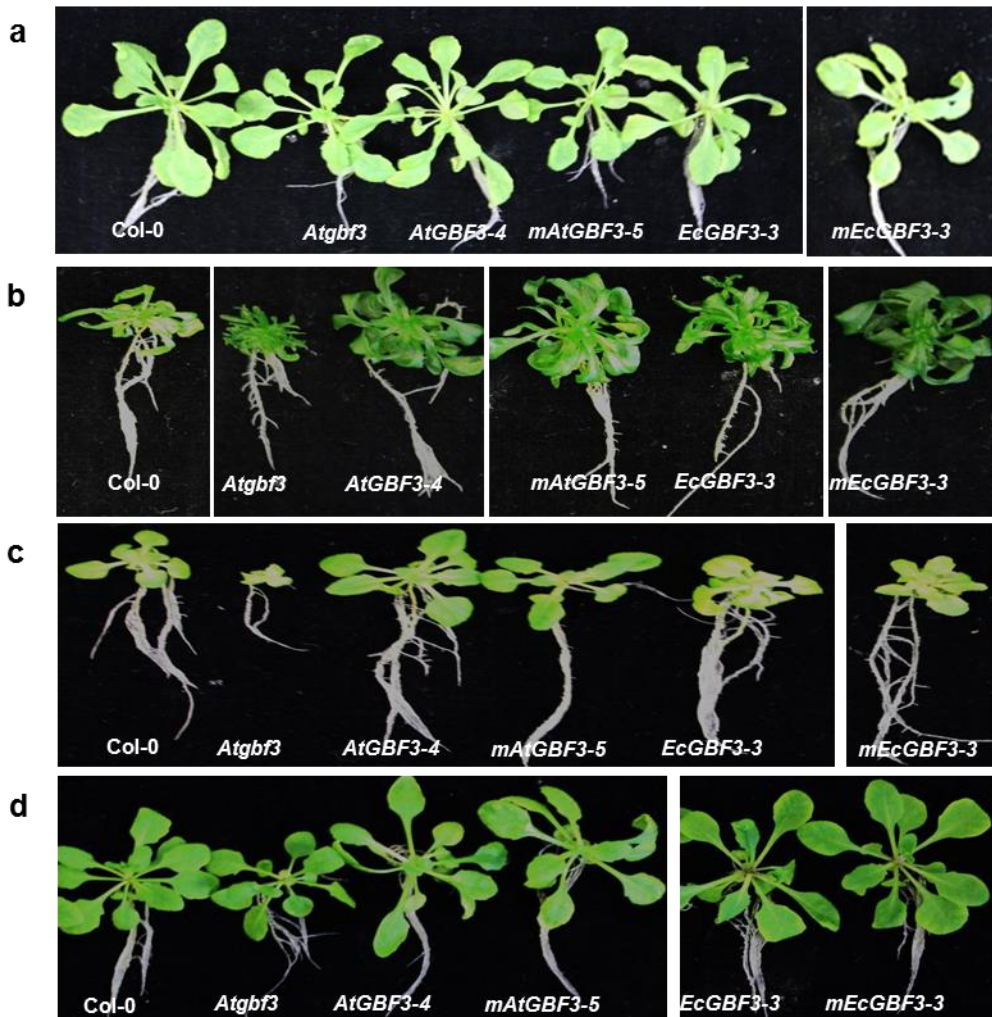

**Fig. S14** Phenotype of Arabidopsis transgenics expressing *EcGBF3* and *AtGBF3* under different stresses. A week old T<sub>2</sub> generation hygromycin (20 mg l<sup>-1</sup>) resistant seedlings were transferred on to medium (1/2 MS, 0.5% sucrose and 0.1 % phytigel) supplemented with different stressors. Photographs were taken from Control (a), 100 mM mannitol (b), 100 mM NaCl (c) and 3 μM ABA (d) treated plants carefully uprooted 10 days after stress treatment. *Atgbf3*, *AtGBF3* mutant; *AtGBF3-4*, transgenic line overexpressing *AtGBF3*; *mAtGBF3-5*, transgenic line overexpressing *AtGBF3* in the *Atgbf3* mutant background; *EcGBF3-3*, transgenic line overexpressing *EcGBF3*; *mEcGBF3-3*, transgenic line overexpressing *EcGBF3* in the *Atgbf3* mutant background.

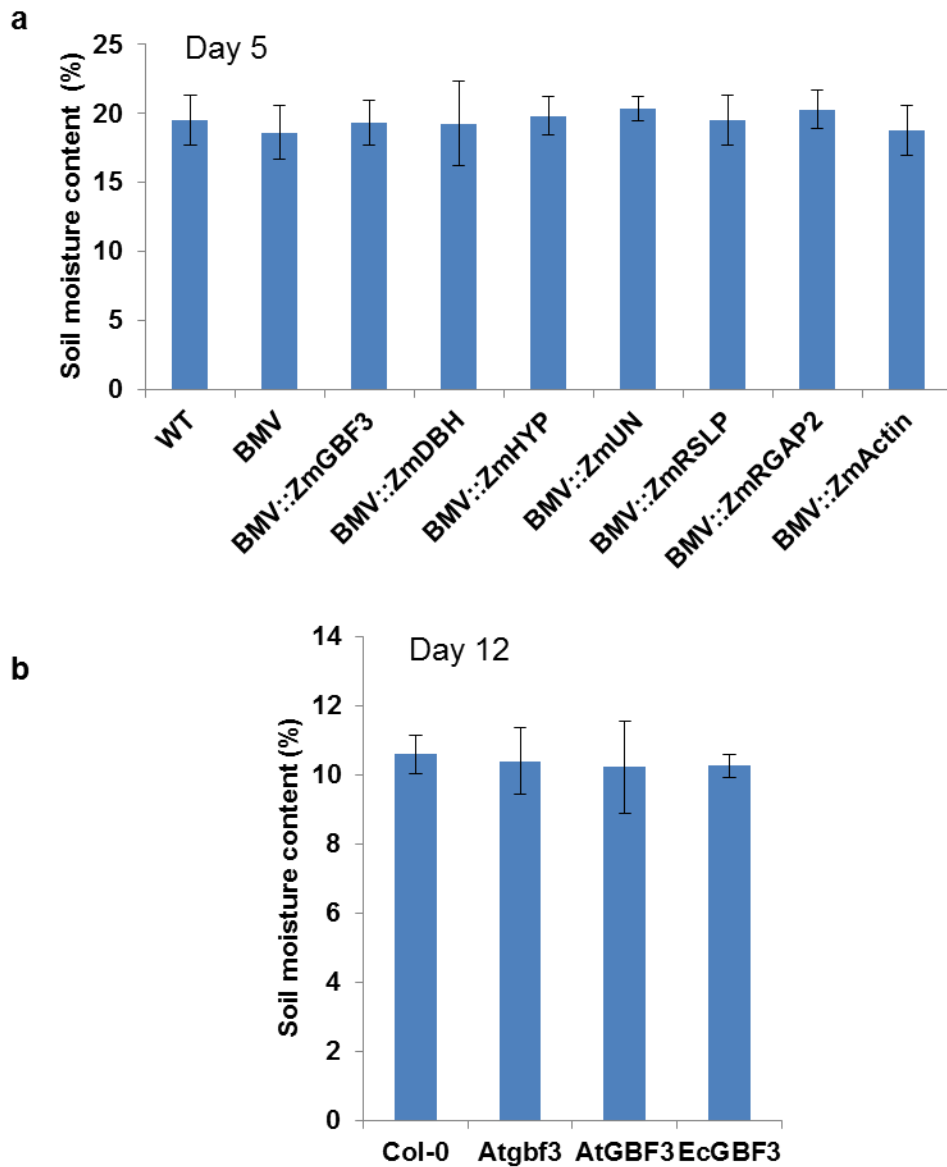

**Fig. S15** Soil moisture content of plants subjected to drought stress. During VIGS experiment, maize plants at 14 dpi were subjected to drought stress by withholding irrigation for four days. Soil moisture content (a) was measured on volume basis using soil moisture meter at the end of stress period. The values are means  $\pm$  SE (n=5). Drought phenotype of gain-of-function and loss-of-function of GBF3 in Arabidopsis was studied by subjecting three week old plants to drought stress by withholding irrigation for 12 days. Soil moisture content (b) was measured on volume basis using soil moisture meter at the end of stress period. The values are means  $\pm$  SE (n=10). Soil moisture meter is supplied with two general soil calibrations to convert the output from the sensor into per cent soil moisture content. One for mineral soils (predominantly sand, silt and clay) and another for organic soils (with a high organic matter content). As the potting mix used here was rich in organic matter content, organic soil calibration was used to convert the output from instrument to per cent soil moisture content.



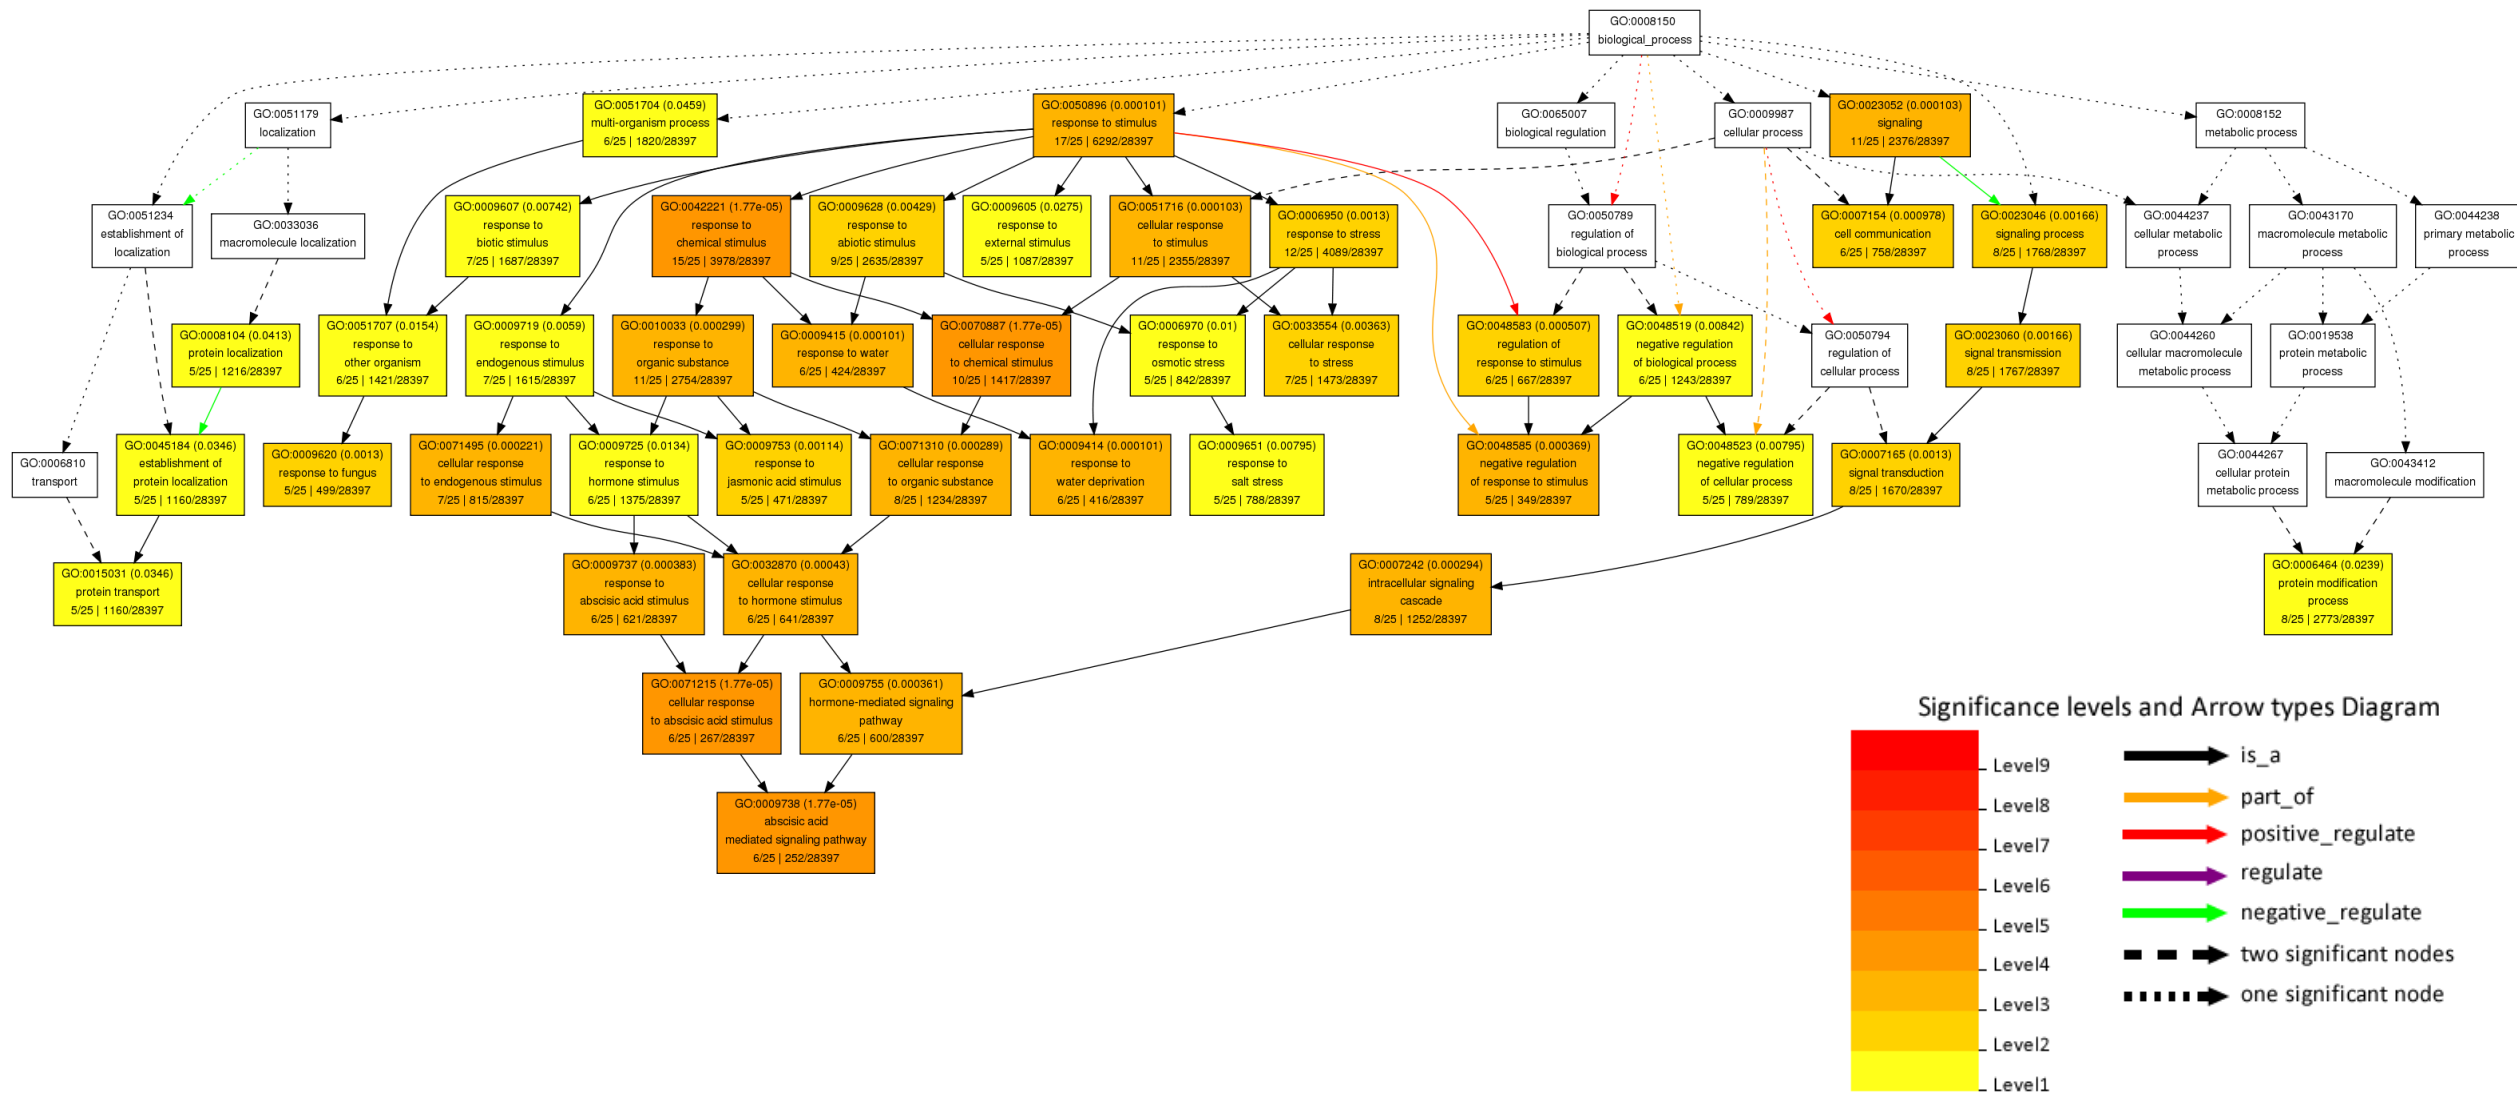

**Fig. S16** Biological process enrichment of high confidence predicted targets of AtGBF3. Singular Enrichment Analysis (SEA) of AGRIGO (<http://bioinfo.cau.edu.cn/agriGO/analysis.php>) was used to perform biological process enrichment with 25 predicted targets of AtGBF3 with q value  $\geq 0.001$ .

**Table S1.** Primers used in the study.

Primers used in qPCR analysis of finger millet ESTs

| NCBI GenBank acc# | Primer (5' to 3')         | Product size |
|-------------------|---------------------------|--------------|
| FD661788          | AACAGGCGCCAAAGTGG AATTCAG | 208          |
|                   | TAACATTTGCACCTGAGTCACCGC  |              |
| FD661789          | TGACGTGGTTCGCGTTCAC       | 251          |
|                   | AGCCCACTACAAGCTATACAGGCA  |              |
| FD661790          | TGGCTGTTCAATTACGGTATCGGC  | 248          |
|                   | TGCAGATCTCGATCATGAAGCCG   |              |
| FD661791          | ATGAGCTGAGGGAGGAGAAGCAA   | 228          |
|                   | TATCCACATCTGAAGGCGGCATGA  |              |
| FD661792          | TACGGCGAACAATCCCTACGTGAA  | 202          |
|                   | GTAGACGAGCAATGCACGCAACAA  |              |
| FD661795          | TTTGCTGCTGCTGCTTGAGGGAAA  | 204          |
|                   | GGCTCAAAGAAGTGGGCATCC     |              |
| FD661798          | AAGATTGACGAGAATGTGGCGAGG  | 236          |
|                   | TGCATGAAGTGGCAGTAACTCACG  |              |
| FD661799          | ATGCCCAGAAGGATCAAGAACGGA  | 229          |
|                   | ATCTTTGAGACGGCCTTGTTTGCG  |              |
| FD661801          | GCGCTCACAAGACAAGTCACTGAA  | 225          |
|                   | AACTCACCGGTAAGGTATGACGGG  |              |
| FD661802          | ACGCGGCAATGAAGAAAGTACTGG  | 292          |
|                   | TACAGGCAGCAGCAACGGTAGTTA  |              |
| FD661805          | GCCGAAGGTATCTAAGGTCCATCA  | 215          |
|                   | CCCAGCAGGGCAATTAACAGCTTA  |              |
| FD661806          | AGAACCAAGGGTGGTTCCTGATC   | 247          |
|                   | AAGACAGCCGATGTGTGGTCTTG   |              |

|          |                           |     |
|----------|---------------------------|-----|
| FD661807 | AAGGATGGGAGAGAAGAAGCCTG   | 200 |
|          | TGCACGTACCATCGACTATTGCAG  |     |
| FD661809 | AGAAGGGTGCAGGCTGGTG       | 244 |
|          | AGCAGCGGGTGATCAAAGTAGAGA  |     |
| FD661810 | AGGGCATCATGGACAAGATCAAGG  | 204 |
|          | AGACTCTTCACACTGCCACAACA   |     |
| FD661811 | TACATCGGCTACTCCAACATCTGC  | 247 |
|          | TTCCAGGCACAACAGCTCGCAA    |     |
| FD661816 | TGTGGCGAGGGAGATCATAAACCA  | 222 |
|          | TGCATGAAGTGGCAGTAACTCACG  |     |
| FD661818 | AGCAATGGTGGCCTCTCATGATC   | 236 |
|          | TACTTGTCGACGAACTGGTACACG  |     |
| FD661819 | TTCATCGACCTCCAGCTATGACGA  | 200 |
|          | ATGATGGTTCCAGCAACACCAACG  |     |
| FD661820 | AGTGAGAGAGCGAGAGATACGCTG  | 282 |
|          | TCTCACTCTGCTACGCTGACTAC   |     |
| FD661824 | GATGTGTTCGCAAAGCCGATTCCA  | 210 |
|          | GTCACGATTTACAGGCCATTCCA   |     |
| FD661827 | AATCTTCACCAAGCCAGTGGGAGA  | 205 |
|          | AGCTAGCTTGGCTTCAAAGGGAC   |     |
| FD661830 | TTCCGGGAACCTTAATCTGCTC    | 241 |
|          | CGCAGCCAGTATAAACAGACGGTA  |     |
| FD661833 | AAGATATGGTGGTGGCAAAGCAGC  | 211 |
|          | TTCAATCTTCTCACCCACGGTCCA  |     |
| FD661834 | AGGTGTACAACGTGCTGAGCAAAG  | 202 |
|          | ATGGCCTGGTCGCTGAGTTTCATA  |     |
| FD661839 | CCC CGG GCC AAA GGC AGG C | 240 |
|          | CCC CCC GGG GAA GCC CCC   |     |

|          |                            |     |
|----------|----------------------------|-----|
| FD661843 | AGAAGGAGGACAAGAACGACACC    | 204 |
|          | CGTCGAAGCCTTAACCAGTGATCTGA |     |
| FD661844 | AATCTGATGGCCGATGTTGTGGAG   | 209 |
|          | AATGCCTTAACTGCTCCCAGTTGC   |     |
| FD661845 | AACAAGATGCTTTCATGTGCCGGG   | 245 |
|          | TCAGTGCGGTTGAACTTGGTGAAG   |     |
| FD661851 | GACTACATTCCAAAGGCGCACACA   | 241 |
|          | GCCTCCGCAATGCACGATATTCA    |     |
| FD661852 | AGAGTTTCCAAGGCAATCAGCGAG   | 213 |
|          | AGCTCCTGTCTTGATTTGACCCG    |     |
| FD661854 | TGTCACGTGTGCGCAAGACAAATGG  | 230 |
|          | ATGGAGGATGTGCGATGTGTGTGG   |     |
| FD661860 | TGATGAGATAGCAGAGCACGCTGA   | 249 |
|          | CACCATGTTCAACCACAAATGCCGA  |     |
| FD661861 | GCATCTTCATTCATGCCCTCA      | 200 |
|          | TGCTGCCCGTTCAGTAACTCATC    |     |
| FD661862 | AACTTGTTCTGTGCACTTCACCGC   | 206 |
|          | AGGCATGGGTAAAGCAGCGATTTG   |     |
| FD661865 | ATGACATGCGTGTGAGCACAACAG   | 228 |
|          | ATCACTCCGTATCCCGTCGTTACA   |     |
| FD661866 | TCACAACCTCAGTCACGGACAACA   | 248 |
|          | CGAGTTCTGCATATGCTCCGTCG    |     |
| FD661867 | TACCCACATCGTTCCTGTTGCTGA   | 231 |
|          | TTTGAGGGCTCCCTGTCATGCTTA   |     |
| FD661869 | AGGTGCTCACCAACGGAAAGTACA   | 219 |
|          | TCAAGCTTGCTAGAGAAGACGAGC   |     |
| FD661870 | TTCCTAATTGGCGGCAAGATGCAG   | 205 |
|          | AACCCATCGTAGAAGCCACCGAA    |     |

|          |                          |     |
|----------|--------------------------|-----|
| FD661871 | ATCACTACAACCAGCATCCTGTGC | 201 |
|          | TTCCAGAATACACACACAAGGCC  |     |
| FD661872 | TGCCCCGAAGAAGGACAACAGCTA | 223 |
|          | ATTTAGCCACATCCATTGGCAGCG |     |
| FD661873 | ACTGAATCGACATCCTCATCGCCA | 204 |
|          | ACATTACCACCACAGGCAGTCGAA |     |
| FD661875 | TGTGGACTGCAGTGGAGATGACAA | 247 |
|          | TTTGATATTCGTGATGCGCTGGGC |     |
| FD661876 | TGAACGTGAGGAGCGTGCTAAGAA | 202 |
|          | TGTCGGGAATTCCGATTTGTCCTG |     |
| FD661877 | AAGAGTTCATGGCCGGAGTTAGTG | 206 |
|          | CAAGCTTTGATCAAGCGAGCTGG  |     |
| FD661878 | CGTGATCGAGTTCATCCTCTTCCA | 246 |
|          | AGTTGTGCTGGATCAGGAATCCCA |     |
| FD661879 | AGCAGCTAGGAGCAAGTTTCAAGG | 232 |
|          | ACAGTTGACTTGGAGGAACCACC  |     |
| FD661880 | TTTCGCATGTCCGTACATTGGTGG | 235 |
|          | TGCATGTGGGAGCTCAATTGCTTC |     |
| FD661883 | AGGAGTTTGAGGAGTACGCTGAGA | 228 |
|          | GCTTCACCTTGGTATGTAATCGG  |     |
| FD661884 | TGGCTCATGATGAAGCAGTGGCTA | 221 |
|          | AATATGTTGGTGGCAACACGCCAG |     |
| FD661885 | TGCAGAACACCTGCCTCAAGA    | 214 |
|          | AAGAGAAGAGTACGTAGTGACCGC |     |
| FD661886 | GCCTTTGGCGATAAGAAGGAAGGA | 204 |
|          | ACACTGTTGTGTTACAACGCCAGC |     |
| FD661887 | ATCAAGTACGGCGACGCCTTCAA  | 257 |
|          | ACCGGGTCCTGGGTGATGTTGA   |     |

|          |                           |     |
|----------|---------------------------|-----|
| FD661890 | AATGAATCCGGAGGATGAGGCTGA  | 249 |
|          | TTCATCCACCTCCATTGCCTTGAC  |     |
| FD661892 | TGAACGTGAGGAGCGTGCTAAGAA  | 202 |
|          | AGTGTCGGGAATTCCGATTTGTCC  |     |
| FD661893 | TGCCTTGTGCCCTATCCTTGCTA   | 261 |
|          | AAACCCATGCCGTGTTCTTCTTCC  |     |
| FD661894 | ACGTTCAAGGTACACGCACACAAC  | 221 |
|          | GGCTGATAAACCGCATTGATCCAC  |     |
| FD661895 | CTACACACCATAGACAACAACCGC  | 212 |
|          | TCGAGGTCTGAAGTAGACGCTCTTG |     |
| FD661896 | AAGGAAATTGATGGGACTGCCGTG  | 206 |
|          | TGCTAATCGGCCTGGTTCTCTTG   |     |
| FD661897 | ATCGACTGCTCCAGGGTCAGCTAAA | 206 |
|          | TCTTCTACGGAGCGTATAGGAGTG  |     |
| FD661900 | CTATGCAGCTGCTTTCCACCAAGA  | 200 |
|          | TATTTCTTGCCACCACGTTCCGCA  |     |
| FD661903 | AAGGCAACGGGTTGAATTTCCAGG  | 249 |
|          | TTCGAGCCTTGTCCATGAGTACGA  |     |
| FD661904 | TTTGCTGAGGCAAATGCTGAGGAC  | 232 |
|          | TGATCCACCCTTGGAGCTGAATGA  |     |
| FD661907 | TGACAAGGTTAAAGGTGCCGATGG  | 205 |
|          | CGTTCACCGAACGCATTATGAGCA  |     |
| FD661908 | GGAAGGTGCGCAAGATGAAGATGA  | 239 |
|          | GTTGCTGCTGTCGTAGTGGTTGTA  |     |
| FD661909 | AACAGCTGGAAGAACGCATGGAAG  | 200 |
|          | ACAGCTGAAACTTGTTGAACGGGC  |     |
| FD661910 | AAGCCAGACATGGGTCCTGAAGAA  | 208 |
|          | AGGGCCAGGCGAATAGAGAAACAA  |     |

|          |                            |     |
|----------|----------------------------|-----|
| FD661912 | TGCAGAACACCTGCCTCAAGA      | 214 |
|          | AAGAGAAGAGTACGTAGTGACCGC   |     |
| FD661914 | AGGAATAACGGGCCATCATGGGTA   | 245 |
|          | TAGTAGAGGTGAATGACGAGAGGCGA |     |
| FD661915 | AAATGCCTTCTGGATGGGAACCTG   | 203 |
|          | AAATGAAGCCATCCATGCCACTCC   |     |
| FD661916 | GGTATTGCTTGCTGCCTGGTTATACG | 249 |
|          | TAGTCCTCCTCGACGATGGTGTC    |     |
| FD661917 | ACAACATGTTCCGCTCAATCGTCC   | 208 |
|          | TCTTCCTTCTCCTTGCTGCGTTCA   |     |
| FD661919 | TCGAGCACTACTGACGACTACGAA   | 206 |
|          | AGATGCTCCTTGTGCTTGTGC      |     |
| FD661920 | AAGAAGCAGAAGCAGGGTCATCAG   | 238 |
|          | ACAGTAACACGGCTGCAGCAA      |     |
| FD661922 | AAGAACGACAAGTGGCACAAGGTG   | 231 |
|          | ATTAACGGATTCAAGACGAGGCGG   |     |
| FD661923 | TCGGCATTGTGGTGAACATGGTG    | 240 |
|          | TTGTCAGGCAGCAAGAGTTTCCAC   |     |
| FD661924 | AAGCTCTGCTGAATGACCCTGTC    | 233 |
|          | AGAGATGGCACTTGGAAGTCTGC    |     |
| FD661925 | CGATGCTGCATTGGCTGGCTTAATTG | 244 |
|          | TTGAAAGCAGCAGCACTAGGTCTC   |     |
| FD661928 | ATGCCATCAAGAAGGATGAAGGAGGG | 200 |
|          | GAACTGCAGCTGGATCTTCTTCTG   |     |
| FD661929 | TTCTCTGGTGTGAGAAGTGACAGC   | 244 |
|          | AAGCTTGGACGAGAGCACAGACA    |     |
| FD661930 | TGGCCAGCCAATGGATTTCAACAC   | 246 |
|          | CTTGTAGTTACACGCCGACGCAA    |     |

|                               |                          |     |
|-------------------------------|--------------------------|-----|
| FD661933                      | TTGGCGAGCCATTGACACCTCTTA | 236 |
|                               | TTGCTGGATCAAAGCTCCTCCAGA |     |
| FD661936                      | GCCGTGCAAGTTTATGAAGCCGAA | 274 |
|                               | ATACAGCCAACACACTAGCGACGA |     |
| FD661937                      | ACAAGGACTCCGGCGACGTCAA   | 209 |
|                               | TTCTCCTTCTCCTTCACCTCCGA  |     |
| FD661938                      | ATGTGAAAGCCCTGTACAGAAGGG | 217 |
|                               | ATGTGCTCCACCTTCCTCCATTTC |     |
| FD661940                      | ATGGTGTGTGGTTTAGGGAGTTGC | 257 |
|                               | ATCACAGACAGCACACCATCTCCA |     |
| FD661941                      | CCTACTACTCGCTGGGCATCAG   | 242 |
|                               | GGGTAGCGCGATATCCAACATGAA |     |
| FD661946                      | TGCTGAGGTTGGGAGGTTAACGAA | 244 |
|                               | ATCTAACAGCACTGCGAAGGAGCA |     |
| <i>EcActin1</i><br>(HE800188) | TTCTCACGCTCAAGTACCCAATCG | 237 |
|                               | AGAGGGAGAGCACTGCTTGAATTG |     |

Primers used for semi-quantitative RT-PCR analysis of finger miller ESTs

| EST name                             | NCBI<br>GenBank<br>acc# | Primer                     |
|--------------------------------------|-------------------------|----------------------------|
| Early light inducible protein (ELIP) | FD661789                | CAACGGCCGGCTCGCCATGGTGGGC  |
|                                      |                         | TATGCGTGTGTTATACTTGA ACTAT |
| Chlorophyll a/b binding protein      | FD661801                | GCATCCTCGCGCTCACAAGACAAGT  |
|                                      |                         | ATCTGCGCGCCGGCCTTGAACCACA  |
| RAB17 protein                        | FD661810                | GCAAGACAACCTAGTGATTTGAGTG  |
|                                      |                         | GCCAGTACCCATCTGCTGCTGGTCA  |
| Cytosolic class I small heat shock   | FD661843                | GGAGAAGGAGGACAAGAACGACAC   |



|                                                                          |          |                                                        |
|--------------------------------------------------------------------------|----------|--------------------------------------------------------|
| protein 3D                                                               |          | CAACAAGCTGATATTTATTCCTTC                               |
| Chlorophyll a/b binding protein precursor                                | FD661878 | TTCTCTCTCTCCTGACCACCCCGGG<br>GTACCCTGCGGCGCGTTGATGAGCC |
| Salt stress inducible bZIP protein                                       | FD661884 | GGTCTCTCTGTGCGCACAGCCTCGG<br>ACCTGGAGCTAATGCTGGAGCAAAA |
| Fructose biphosphate aldolase chloroplast precursor, putative, expressed | FD661885 | GCTCAACGCCATGAACCAGGGCGCC<br>TTCTCTCTCTCCTACAATATTGGCG |
| Hypothetical protein Osl-003067                                          | FD661886 | GGGCGCCGTGCAGATCGAGAAGGTG<br>TGCAAGCTTAGAAACTGGTTTTTAG |
| Late embryogenesis abundant protein D-34 (LEA D-34)                      | FD661887 | CTGAAGCAACACACGACCAGATCAG<br>CCACCACCTGTCCCGCGACGAACTC |
| G-box binding factor 3                                                   | FD661896 | GGTTACTCAGATCTCAGTAAAAGCA<br>ATGCCATTTGGTTGGTTCCATCACT |
| RNase S-like protein precursor                                           | FD661909 | TTTTGATCAGTGTACGTCAATAGAG<br>GTAGTCCCTCTCATCGAAGCCGGAG |
| Fructose-biphosphate aldolase chloroplast precursor, putative, expressed | FD661912 | CTCAACGCCATGAACCAGGGCGCCA<br>GTTCTCTCTCTCCTACAATATTGGC |

Primers used in qPCR analysis of *AtGBF3*

|                                 |                             |
|---------------------------------|-----------------------------|
| <i>AtGBF3</i>                   | CTAGAGTTAAGAACTCAGGAGCTGG   |
|                                 | CCATAACACCAAATTTTCATCTGGAGG |
| <i>AtEF1<math>\alpha</math></i> | TCCGTCGGAGCTCAATTCTC        |
|                                 | AGGAAGCTCGAGTGCCAAGTAC      |

Primers used in PCR confirmation of homozygous *Atgbf3* mutant plants

|             |                       |
|-------------|-----------------------|
| SALK_082840 | AAATGGGAATCCTGAAAATGG |
|-------------|-----------------------|

|          |                       |
|----------|-----------------------|
|          | GAGCATTTTCAGTTTGTCTGC |
| T-DNA LB | ATTTTGCCGATTTTCGGAAC  |

Primers used to clone orthologs of finger millet drought stress induced genes in maize and other marker gene fragments

|                |                         |     |
|----------------|-------------------------|-----|
| <i>ZmHYP</i>   | AGACCACGTACCAGCGCGCAC   | 346 |
|                | AGAGCAGCCAAGCAGCGGACAC  |     |
| <i>ZmRGAP2</i> | ATGGCCGATGTTGTAGAGCAAG  | 386 |
|                | GGCTCGTGAGAACGGATTTG    |     |
| <i>ZmDBH</i>   | CAGGCTATGGCATATGGGCC    | 388 |
|                | CACATCTGAGGTTAGCTAGTTGC |     |
| <i>ZmUN</i>    | CAAGCCGGTACAGTGCTGG     | 394 |
|                | GTGGAGGTACAATAGCAACAGCG |     |
| <i>ZmGBF3</i>  | ATGGGTCATGATGAAGCTGTAG  | 331 |
|                | CCTTGCTGTTCCCAGACTTAGC  |     |
| <i>ZmRSLP</i>  | GGGTGCTGCAAGCCGACCAC    | 370 |
|                | CCTTGGTGATCGCCTTGAGGC   |     |
| <i>ZmUBI7</i>  | CAAGCAGCTCGAGGACGGGCGC  | 490 |
|                | ATCCTCCAGCTGCTTGCCAGC   |     |

Other primers used in the study

|                                  |                           |
|----------------------------------|---------------------------|
| M13                              | GTAA AACGACGGCCAGT        |
|                                  | CAGGAAACAGCTATGAC         |
| <i>EcGBF3</i> GeneRacer primers  | CCCTGGTCATGTCCCTCCATTTATG |
|                                  | CAACTGAATGGCCAGCTAAGGATG  |
| <i>EcGBF3</i> ectopic expression | ATGGGCCTTGATGAAGCTGTAG    |
|                                  | TCAGCTAGCGGCGATGGCGTCAG   |
| <i>EcGBF3</i> qPCR in            | GGTTACTCAGATCTCAGTAAAAGCA |

|                                      |                           |
|--------------------------------------|---------------------------|
| <i>Arabidopsis</i> transgenic plants | ATGCCATTTGGTTGGTTCCATCACT |
|--------------------------------------|---------------------------|

Primers used in qPCR analysis of *AtGBF3* predicted targets

|                 |                        |
|-----------------|------------------------|
| AT1G69260       | GAGCCACAAGGGAAAGGAAA   |
|                 | TCTTCTCCACTGCCGTATCT   |
| AT3G29575       | CTCACCGGCAGAATTCGTTA   |
|                 | ACCCAAAGGGTCACAAGAAG   |
| AT1G75170       | CTCCAAGCAAATGAACCAAGAC |
|                 | GGCAATCTCAGCTCCAGAAA   |
| AT1G72770       | ACCTCTCAATGCTTGCTCTAC  |
|                 | AGCTTCAGGTTCTGGTCTTG   |
| AT5G59220       | TGCCAGATAAAGCGTGTGAG   |
|                 | ACTACGTGTCTCGTCGTAGAT  |
| <i>AtACTIN2</i> | ATTCTTGCTTCCCTCAGCAC   |
|                 | CCCCAGCTTTTTAAGCCTTT   |

**Table S2.** Candidate siRNAs, siRNA efficiency and off targets identified from the siRNA scan tool.

| Gene Name      | GenBank acc# | DFCI Gene Index | No. of siRNA candidates | siRNA efficiency* | Off targets ID                                                                                                                             |
|----------------|--------------|-----------------|-------------------------|-------------------|--------------------------------------------------------------------------------------------------------------------------------------------|
| <i>ZmRGAP2</i> | NM_001139255 | TC470875        | 2                       | 6.1-7.14          | TC533739                                                                                                                                   |
| <i>ZmDBH</i>   | NM_001152987 | TC459150        | 4                       | 7.15-8.69         | BG462726                                                                                                                                   |
| <i>ZmUN</i>    | NM_001148288 | TC488830        | 5                       | 6.7-8.82          | TC539834;<br>TC537690                                                                                                                      |
| <i>ZmGBF3</i>  | BT063685     | TC458346        | 2                       | 6.44-10.0         | Nil                                                                                                                                        |
| <i>ZmHYP</i>   | NM_001158082 | TC508811        | 11                      | 6.49-8.86         | CO448659;<br>FL396282;<br>TC494000                                                                                                         |
| <i>ZmRSLP</i>  | EU955694     | TC490487        | 18                      | 6.17-9.76         | FL097244;<br>TC503176;<br>TC500465;<br>DR821741;<br>TC484715;<br>FL097203;<br>FL455990;<br>FL097212;<br>TC507475;<br>FL011887;<br>FL097197 |

\*Range of 0 to 10 for no silencing to complete silencing of the target.

**Table S3.** Functional annotation of ESTs identified from finger millet drought stress cDNA library.

| NCBI GenBank accession # | Functional annotation                     | Organism                       | E-value   |
|--------------------------|-------------------------------------------|--------------------------------|-----------|
| FD661788                 | Putative vacuolar ATP synthase subunit G1 | <i>Zea mays</i>                | 1.00E-101 |
| FD661789                 | Early light-inducible protein             | <i>Panicum virgatum</i>        | 7.00E-69  |
| FD661790                 | Lactoylglutathione lyase family protein   | <i>Zea mays</i>                | 4.00E-157 |
| FD661791                 | Helix-loop-helix-like protein (HLH)       | <i>Zea mays</i>                | 8.00E-149 |
| FD661792                 | 17 kDa class I small heat shock protein   | <i>Zea mays</i>                | 1.00E-06  |
| FD661793                 | Putative vacuolar ATP synthase subunit G1 | <i>Zea mays</i>                | 5.00E-101 |
| FD661794                 | Predicted proline rich protein 2          | <i>Zea mays</i>                | 5.00E-11  |
| FD661795                 | Glyoxalase I family protein               | <i>Sorghum bicolor</i>         | 7.00E-54  |
| FD661796                 | Heat shock protein 16.9                   | <i>Pennisetum glaucum</i>      | 7.00E-29  |
| FD661797                 | Predicted protein                         | <i>Solanum lycopersicum</i>    | 6.00E-77  |
| FD661798                 | Stress kinase                             | <i>Brachypodium distachyon</i> | 0         |
| FD661799                 | Putative heat shock 70 kDa protein        | <i>Oryza sativa Japonica</i>   | 2.00E-130 |
| FD661801                 | Chlorophyll a/b binding protein           | <i>Zea mays</i>                | 0         |
| FD661802                 | Acyl CoA binding protein                  | <i>Sorghum bicolor</i>         | 3.00E-90  |
| FD661803                 | Protein of unknown function DUF946        | <i>Gossypium hirsutum</i>      | 1.00E-05  |
| FD661804                 | Subtilisin-like protease SUB5             | <i>Medicago truncatula</i>     | 0.099     |
| FD661805                 | Hypothetical protein                      | <i>Solanum lycopersicum</i>    | 3.00E-134 |
| FD661806                 | Osmotic stress-activated protein kinase   | <i>Hordeum vulgare</i>         | 0         |

|          |                                                 |                               |           |
|----------|-------------------------------------------------|-------------------------------|-----------|
| FD661807 | Aminotransferase-like protein                   | <i>Oryza sativa Japonica</i>  | 0.007     |
| FD661808 | Cytochrome P450 superfamily protein             | <i>Brassica rapa</i>          | 1.00E-18  |
| FD661809 | Hypothetical protein OsJ_000720                 | <i>Oryza sativa</i>           | 5.00E-35  |
| FD661810 | RAB17 protein                                   | <i>Cleistogenes songorica</i> | 3.00E-160 |
| FD661811 | Mitochondrial F1F0 ATP synthase epsilon subunit | <i>Zea mays</i>               | 5.00E-91  |
| FD661812 | Collagen, type III, alpha 1                     | <i>Medicago truncatula</i>    | 0.1       |
| FD661813 | Sensor protein baeS                             | <i>Medicago truncatula</i>    | 9.00E-14  |
| FD661814 | Hypothetical protein                            | <i>Oryza sativa Japonica</i>  | 0.03      |
| FD661815 | Hypothetical protein PBAL39_01302               | <i>Raphanus sativus</i>       | 8.00E-19  |
| FD661816 | Osmotic stress-activated protein kinase         | <i>Oryza sativa Japonica</i>  | 0         |
| FD661817 | RAB17 protein                                   | <i>Oryza sativa Japonica</i>  | 1.00E-152 |
| FD661818 | Photosystem II 10 kDa polypeptide               | <i>Zea mays</i>               | 5.00E-86  |
| FD661819 | Stress-induced transcription factor NAC1(NAC1)  | <i>Oryza sativa Japonica</i>  | 1.00E-87  |
| FD661820 | Predicted protein                               | <i>Oryza sativa Japonica</i>  | 3.00E-30  |
| FD661821 | Dehydrin1                                       | <i>Cleistogenes songorica</i> | 6.00E-87  |
| FD661822 | GNAS complex locus                              | <i>Zea mays</i>               | 3.00E-20  |
| FD661823 | Nuclear ribonucleoprotein-associated protein B  | <i>Vitis vinifera</i>         | 0.008     |
| FD661824 | Proline rich protein                            | <i>Solanum lycopersicum</i>   | 2.00E-112 |
| FD661825 | Osmotic stress-activated protein kinase         | <i>Zea mays</i>               | 0         |
| FD661826 | RAB21 protein                                   | <i>Oryza sativa Japonica</i>  | 7.00E-75  |

|          |                                                      |                                |           |
|----------|------------------------------------------------------|--------------------------------|-----------|
| FD661827 | Putative 4-hydroxyphenylpyruvate dioxygenase         | <i>Zea mays</i>                | 0         |
| FD661829 | Putative arginine/serine-rich protein                | <i>Panicum virgatum</i>        | 3.00E-05  |
| FD661830 | Chain D, 4-Hydroxyphenylpyruvate Dioxygenase         | <i>Oryza sativa Japonica</i>   | 1.00E-67  |
| FD661831 | Osmotic stress-activated protein kinase              | <i>Hordeum vulgare</i>         | 0         |
| FD661832 | Cytokinesis protein sepA                             | <i>Vitis vinifera</i>          | 0.091     |
| FD661833 | Synptobrevin-related protein                         | <i>Oryza sativa Japonica</i>   | 0         |
| FD661834 | DNAJ heat shock N-terminal domain-containing protein | <i>Brachypodium distachyon</i> | 8.00E-154 |
| FD661836 | Alpha 1 type XXIV collagen                           | <i>Solanum lycopersicum</i>    | 0.095     |
| FD661837 | Hypothetical protein CIMG_06839                      | <i>Zea mays</i>                | 1.00E-13  |
| FD661838 | Hypothetical protein OsJ_032036                      | <i>Solanum lycopersicum</i>    | 0.028     |
| FD661839 | Single stranded DNA binding protein                  | <i>Zea mays</i>                | 7.00E-04  |
| FD661840 | Hypothetical protein                                 | <i>Hordeum vulgare</i>         | 2.00E-38  |
| FD661841 | Osmotic stress-activated protein kinase              | <i>Brachypodium distachyon</i> | 0         |
| FD661842 | Heat shock protein 17.0                              | <i>Oryza sativa Japonica</i>   | 8.00E-104 |
| FD661843 | Cytosolic class I small heat shock protein 3D        | <i>Oryza sativa Japonica</i>   | 2.00E-59  |
| FD661844 | Rho GTPase activating protein 2                      | <i>Sorghum bicolor</i>         | 0         |
| FD661845 | 60S ribosomal protein L10                            | <i>Zea mays</i>                | 0         |
| FD661846 | Splicing factor, arginine/serine-rich 4              | <i>Hordeum vulgare</i>         | 5.00E-141 |
| FD661847 | Alpha 1 type IX collagen chain                       | <i>Zea mays</i>                | 3.00E-08  |
| FD661848 | 18 kDa heat shock protein                            | <i>Zea mays</i>                | 2.00E-20  |

|          |                                                       |                                |           |
|----------|-------------------------------------------------------|--------------------------------|-----------|
| FD661849 | Hypothetical protein RUMTOR_0292                      | <i>Populus trichocarpa</i>     | 0.1       |
| FD661850 | Hypothetical protein PB404290.00.0                    | <i>Oryza sativa Japonica</i>   | 9.00E-12  |
| FD661851 | Translation initiation factor IF-2                    | <i>Zea mays</i>                | 4.00E-95  |
| FD661852 | Enolase1                                              | <i>Oryza sativa Japonica</i>   | 8.00E-109 |
| FD661853 | Dehydrin                                              | <i>Sorghum bicolor</i>         | 3.00E-53  |
| FD661854 | FtsH protease 1                                       | <i>Oryza sativa Japonica</i>   | 7.00E-174 |
| FD661855 | Proline-rich protein-1                                | <i>Brachypodium distachyon</i> | 1.00E-13  |
| FD661856 | Rab                                                   | <i>Cleistogenes songorica</i>  | 6.00E-61  |
| FD661857 | Predicted protein                                     | <i>Arachis hypogaea</i>        | 3.00E-11  |
| FD661858 | Retrotransposon protein, putative, Ty1-copia subclass | <i>Solanum lycopersicum</i>    | 0         |
| FD661859 | Hypothetical protein Osl_015128                       | <i>Zea mays</i>                | 5.00E-25  |
| FD661860 | Cold stable pyruvate, orthophosphate dikinase         | <i>Sorghum bicolor</i>         | 5.00E-121 |
| FD661861 | Voltage-gated potassium channel subunit Kv10.1b       | <i>Brachypodium distachyon</i> | 0.007     |
| FD661862 | Multiple stress-responsive zinc-finger protein (ZF_1) | <i>Hordeum vulgare</i>         | 5.00E-07  |
| FD661863 | Photosystem II 10 kDa polypeptide                     | <i>Zea mays</i>                | 1.00E-122 |
| FD661864 | Similar to mCG145496                                  | <i>Oryza sativa Japonica</i>   | 0.086     |
| FD661865 | MT-like protein                                       | <i>Cynodon dactylon</i>        | 8.00E-158 |
| FD661866 | Similar to RISBZ4                                     | <i>Zea mays</i>                | 5.00E-141 |
| FD661867 | Actin-related protein 3                               | <i>Zea mays</i>                | 0         |
| FD661868 | RAB17 protein                                         | <i>Oryza sativa Japonica</i>   | 2.00E-85  |



|          |                                              |                                |           |
|----------|----------------------------------------------|--------------------------------|-----------|
| FD661869 | Putative ethylene-forming enzyme             | <i>Sorghum bicolor</i>         | 7.00E-95  |
| FD661870 | Hypothetical protein Osl_024391              | <i>Oryza sativa Japonica</i>   | 9.00E-94  |
| FD661871 | Pre-rRNA-processing protein ESF2             | <i>Vitis vinifera</i>          | 3.00E-20  |
| FD661872 | Metallothionein-like protein                 | <i>Brachypodium distachyon</i> | 8.00E-40  |
| FD661873 | Early drought induced protein                | <i>Hordeum vulgare</i>         | 6.00E-46  |
| FD661875 | DEAD/DEAH box helicase                       | <i>Sorghum bicolor</i>         | 0         |
| FD661876 | Salt tolerance protein 2                     | <i>Sorghum bicolor</i>         | 4.00E-102 |
| FD661877 | Putative proteinase inhibitor                | <i>Zea mays</i>                | 1.00E-06  |
| FD661878 | Chlorophyll a/b-binding protein precursor    | <i>Zea mays</i>                | 0         |
| FD661879 | Glutaredoxin                                 | <i>Zea mays</i>                | 1.00E-111 |
| FD661880 | Unknown protein                              | <i>Zea mays</i>                | 8.00E-149 |
| FD661881 | WW domain binding protein 11                 | <i>Zea mays</i>                | 4.00E-13  |
| FD661883 | Putative Acyl-CoA binding protein            | <i>Oryza sativa Japonica</i>   | 7.00E-85  |
| FD661884 | Salt-stress inducible bZIP protein (bZIP)    | <i>Zea mays</i>                | 8.00E-109 |
| FD661887 | Late embryogenesis abundant protein D-34     | <i>Hordeum vulgare</i>         | 2.00E-86  |
| FD661890 | Rice homologue of Tat binding protein        | <i>Oryza sativa Japonica</i>   | 1.00E-172 |
| FD661893 | Anthocyanidin reductase                      | <i>Zea mays</i>                | 1.00E-75  |
| FD661894 | Phosphoenolpyruvate carboxylase              | <i>Oryza sativa</i>            | 3.00E-78  |
| FD661895 | Photosystem I complex PsaH subunit precursor | <i>Sorghum bicolor</i>         | 1.00E-136 |
| FD661896 | G-box binding factor 3 (GBF3)                | <i>Oryza sativa Japonica</i>   | 2.00E-99  |

|          |                                                       |                                |           |
|----------|-------------------------------------------------------|--------------------------------|-----------|
| FD661897 | Non-specific lipid-transfer protein                   | <i>Zea mays</i>                | 6.00E-49  |
| FD661900 | Nuclear antigen                                       | <i>Sorghum bicolor</i>         | 1.00E-96  |
| FD661901 | Metallothionein-like protein 3B                       | <i>Brachypodium distachyon</i> | 1.00E-41  |
| FD661902 | RAB17 protein                                         | <i>Oryza sativa Japonica</i>   | 2.00E-81  |
| FD661903 | Zinc finger (B-box type) family protein (ZF_2)        | <i>Zea mays</i>                | 2.00E-114 |
| FD661904 | Translation initiation factor eIF1                    | <i>Zea mays</i>                | 8.00E-169 |
| FD661907 | Putative cyanase                                      | <i>Brachypodium distachyon</i> | 1.00E-66  |
| FD661908 | Geranylgeranyl hydrogenase                            | <i>Zea mays</i>                | 0         |
| FD661909 | RNase S-like protein precursor                        | <i>Hordeum vulgare</i>         | 3.00E-34  |
| FD661910 | Proteasome subunit beta type 3                        | <i>Brachypodium distachyon</i> | 0         |
| FD661911 | RAB17 protein                                         | <i>Sorghum bicolor</i>         | 3.00E-58  |
| FD661912 | Fructose-bisphosphate aldolase, chloroplast precursor | <i>Zea mays</i>                | 2.00E-68  |
| FD661913 | Similar to mCG145496                                  | <i>Populus trichocarpa</i>     | 0.09      |
| FD661914 | Extracellular matrix protein                          | <i>Glycine max</i>             | 3.00E-65  |
| FD661915 | Oxidoreductase                                        | <i>Zea mays</i>                | 3.00E-118 |
| FD661916 | Hypothetical protein Osl_023315                       | <i>Brachypodium distachyon</i> | 3.00E-13  |
| FD661917 | Heat shock protein 17.2                               | <i>Oryza sativa Japonica</i>   | 1.00E-131 |
| FD661918 | ATP-binding region, ATPase domain protein             | <i>Sorghum bicolor</i>         | 2.00E-13  |
| FD661919 | Drought inducible 22 kDa protein                      | <i>Saccharum officinarum</i>   | 1.00E-62  |
| FD661920 | Predicted: similar to type X collagen                 | <i>Zea mays</i>                | 2.00E-26  |

|          |                                                            |                                |           |
|----------|------------------------------------------------------------|--------------------------------|-----------|
| FD661921 | Putative proteinase inhibitor                              | <i>Zea mays</i>                | 1.00E-06  |
| FD661922 | Chaperone                                                  | <i>Oryza sativa Japonica</i>   | 3.00E-63  |
| FD661923 | Chain A, Pyruvate Phosphate Dikinase                       | <i>Brachypodium distachyon</i> | 1.00E-82  |
| FD661924 | Asorbate peroxidase                                        | <i>Pennisetum glaucum</i>      | 8.00E-80  |
| FD661925 | Heparan sulfate 6-O-sulfotransferase CG12249-PA, isoform A | <i>Zea mays</i>                | 2.00E-66  |
| FD661926 | Hypothetical protein MED193_13008                          | <i>Vitis vinifera</i>          | 2.2       |
| FD661928 | Hypothetical protein Osl_024391                            | <i>Oryza sativa Japonica</i>   | 2.00E-65  |
| FD661929 | Sapoin-like type B, region 1 family protein                | <i>Oryza sativa Japonica</i>   | 2.00E-53  |
| FD661930 | Predicted proline-rich protein                             | <i>Hordeum vulgare</i>         | 3.00E-38  |
| FD661931 | Actin-related protein 3                                    | <i>Brachypodium distachyon</i> | 0         |
| FD661933 | Putative plastidic ATP/ADP transporter                     | <i>Glycine max</i>             | 4.00E-72  |
| FD661935 | DEAD/DEAH box helicase                                     | <i>Brachypodium distachyon</i> | 6.00E-155 |
| FD661936 | Thioredoxin H                                              | <i>Zea mays</i>                | 7.00E-16  |
| FD661937 | Late embryogenesis abundant protein                        | <i>Sorghum bicolor</i>         | 5.00E-96  |
| FD661938 | Peptidylprolyl isomerase                                   | <i>Oryza sativa Japonica</i>   | 1.00E-31  |
| FD661940 | ATP-binding region, ATPase domain protein                  | <i>Glycine max</i>             | 0.01      |
| FD661941 | Unknown protein                                            | <i>Sorghum bicolor</i>         | 3.00E-163 |
| FD661942 | Predicted protein                                          | <i>Zea mays</i>                | 1.6       |
| FD661945 | Hypothetical protein LbrM03_V2.0300                        | <i>Oryza sativa Japonica</i>   | 0.004     |
| FD661947 | Type 1 metallothionein-like protein                        | <i>Cynodon dactylon</i>        | 2.00E-115 |

|          |                                           |                                |           |
|----------|-------------------------------------------|--------------------------------|-----------|
| FD661948 | Predicted protein                         | <i>Carica papaya</i>           | 3.9       |
| FD661788 | Putative vacuolar ATP synthase subunit G1 | <i>Zea mays</i>                | 1.00E-101 |
| FD661789 | Early light-inducible protein             | <i>Panicum virgatum</i>        | 7.00E-69  |
| FD661790 | Lactoylglutathione lyase family protein   | <i>Zea mays</i>                | 4.00E-157 |
| FD661791 | Helix-loop-helix-like protein (HLH)       | <i>Zea mays</i>                | 8.00E-149 |
| FD661792 | 17 kDa class I small heat shock protein   | <i>Zea mays</i>                | 1.00E-06  |
| FD661793 | Putative vacuolar ATP synthase subunit G1 | <i>Zea mays</i>                | 5.00E-101 |
| FD661794 | Predicted proline rich protein 2          | <i>Zea mays</i>                | 5.00E-11  |
| FD661795 | Glyoxalase I family protein               | <i>Sorghum bicolor</i>         | 7.00E-54  |
| FD661796 | Heat shock protein 16.9                   | <i>Pennisetum glaucum</i>      | 7.00E-29  |
| FD661797 | Predicted protein                         | <i>Solanum lycopersicum</i>    | 6.00E-77  |
| FD661798 | Stress kinase                             | <i>Brachypodium distachyon</i> | 0         |
| FD661799 | Putative heat shock 70 kDa protein        | <i>Oryza sativa Japonica</i>   | 2.00E-130 |
| FD661801 | Chlorophyll a/b binding protein           | <i>Zea mays</i>                | 0         |
| FD661802 | Acyl CoA binding protein                  | <i>Sorghum bicolor</i>         | 3.00E-90  |
| FD661803 | Protein of unknown function DUF946        | <i>Gossypium hirsutum</i>      | 1.00E-05  |
| FD661804 | Subtilisin-like protease SUB5             | <i>Medicago truncatula</i>     | 0.099     |
| FD661805 | Hypothetical protein                      | <i>Solanum lycopersicum</i>    | 3.00E-134 |

**Table S4.** Validation of drought stress response of EST's by expression analysis.

| NCBI GenBank accession # | Functional annotation                                | 60% FC | 35% FC | 60% FC recovery | 35% FC recovery |
|--------------------------|------------------------------------------------------|--------|--------|-----------------|-----------------|
| FD661788                 | Putative vacuolar ATP synthase subunit G1            | 0.55   | 3.24   | 0.97            | 0.24            |
| FD661789                 | Early light-inducible protein                        | 160.17 | 121.09 | 23.65           | 6.98            |
| FD661790                 | Lactoylglutathione lyase family protein              | 0.70   | 10.78  | 1.70            | 0.99            |
| FD661791                 | Helix-loop-helix-like protein (HLH)                  | 0.98   | 2.39   | 1.73            | 1.10            |
| FD661792                 | 17 kDa class I small heat shock protein              | 0.12   | 0.47   | 0.26            | 0.01            |
| FD661795                 | Glyoxalase I family protein                          | 0.60   | 12.02  | 0.22            | 0.10            |
| FD661798                 | Stress kinase                                        | 0.71   | 4.60   | 1.84            | 1.37            |
| FD661799                 | Putative heat shock 70 kDa protein                   | 0.38   | 2.65   | 1.18            | 0.27            |
| FD661801                 | Chlorophyll a/b binding protein                      | 0.09   | 0.04   | 0.26            | 0.05            |
| FD661802                 | Acyl CoA binding protein                             | 1.12   | 1.31   | 0.42            | 2.32            |
| FD661805                 | Hypothetical protein                                 | 0.04   | 0.05   | 0.30            | 0.10            |
| FD661806                 | Osmotic stress-activated protein kinase              | 0.28   | 3.75   | 1.31            | 2.06            |
| FD661807                 | Aminotransferase-like protein                        | 0.16   | 0.12   | 0.59            | 1.04            |
| FD661809                 | Hypothetical protein OsJ_000720                      | 0.83   | 13.83  | 0.40            | 0.10            |
| FD661810                 | RAB17 protein                                        | 113.96 | 125.99 | 107.53          | 117.40          |
| FD661811                 | Mitochondrial F1F0 ATP synthase epsilon subunit      | 0.35   | 1.86   | 0.56            | 0.48            |
| FD661816                 | Osmotic stress-activated protein kinase              | 0.72   | 4.57   | 2.02            | 1.70            |
| FD661818                 | Photosystem II 10 kDa polypeptide                    | 0.17   | 0.13   | 0.78            | 0.03            |
| FD661819                 | Stress-induced transcription factor NAC1(NAC1)       | 0.51   | 3.39   | 0.06            | 0.09            |
| FD661820                 | Predicted protein                                    | 0.11   | 1.10   | 0.17            | 0.10            |
| FD661824                 | Proline rich protein                                 | 0.32   | 3.40   | 0.41            | 0.15            |
| FD661827                 | Putative 4-hydroxyphenylpyruvate dioxygenase         | 0.21   | 2.87   | 0.11            | 0.23            |
| FD661830                 | Chain D, 4-Hydroxyphenylpyruvate Dioxygenase         | 0.15   | 17.85  | 0.29            | 0.09            |
| FD661833                 | Synptobrevin-related protein                         | 0.56   | 2.58   | 2.53            | 1.91            |
| FD661834                 | DNAJ heat shock N-terminal domain-containing protein | 0.05   | 0.50   | 0.32            | 0.06            |
| FD661839                 | Single stranded DNA binding protein                  | 0.08   | 0.46   | 0.48            | 0.04            |
| FD661843                 | Cytosolic class I small heat shock protein 3D        | 2.18   | 113.02 | 0.47            | 1.84            |
| FD661844                 | Rho GTPase activating protein 2                      | 13.62  | 1.36   | 7.45            | 12.03           |

|          |                                                       |       |       |      |       |
|----------|-------------------------------------------------------|-------|-------|------|-------|
| FD661845 | 60S ribosomal protein L10                             | 0.41  | 1.26  | 0.94 | 2.84  |
| FD661851 | Translation initiation factor IF-2                    | 0.26  | 1.53  | 1.41 | 1.21  |
| FD661852 | Enolase1                                              | 0.03  | 0.05  | 0.33 | 0.13  |
| FD661854 | FtsH protease 1                                       | 0.64  | 1.61  | 0.26 | 0.61  |
| FD661860 | Cold stable pyruvate, orthophosphate dikinase         | 0.22  | 0.12  | 0.28 | 0.66  |
| FD661861 | Voltage-gated potassium channel subunit Kv10.1b       | 0.35  | 0.08  | 0.02 | 0.37  |
| FD661862 | Multiple stress-responsive zinc-finger protein (ZF_1) | 0.96  | 1.76  | 0.50 | 0.66  |
| FD661865 | MT-like protein                                       | 0.21  | 1.06  | 0.73 | 0.29  |
| FD661866 | Similar to RISBZ4                                     | 0.15  | 0.82  | 0.55 | 0.26  |
| FD661867 | Actin-related protein 3                               | 6.34  | 13.48 | 2.39 | 8.01  |
| FD661869 | Putative ethylene-forming enzyme                      | 0.72  | 5.05  | 0.71 | 1.28  |
| FD661870 | Hypothetical protein OsI_024391                       | 2.56  | 21.61 | 0.92 | 1.12  |
| FD661871 | Pre-rRNA-processing protein ESF2                      | 0.05  | 4.27  | 0.48 | 0.17  |
| FD661872 | Metallothionein-like protein                          | 1.97  | 6.19  | 1.81 | 5.11  |
| FD661873 | Early drought induced protein                         | 2.80  | 17.70 | 0.57 | 2.61  |
| FD661875 | DEAD/DEAH box helicase                                | 5.16  | 1.76  | 3.53 | 15.90 |
| FD661876 | Salt tolerance protein 2                              | 1.07  | 2.15  | 1.41 | 4.55  |
| FD661877 | Putative proteinase inhibitor                         | 1.58  | 34.51 | 1.07 | 3.04  |
| FD661878 | Chlorophyll a/b-binding protein precursor             | 0.10  | 0.03  | 0.24 | 0.03  |
| FD661879 | Glutaredoxin                                          | 1.43  | 2.47  | 0.58 | 1.78  |
| FD661880 | Unknown protein                                       | 24.31 | 45.05 | 1.32 | 9.64  |
| FD661883 | Putative Acyl-CoA binding protein                     | 1.03  | 1.41  | 1.15 | 4.37  |
| FD661884 | Salt-stress inducible bZIP protein (bZIP)             | 27.92 | 92.05 | 0.54 | 0.48  |
| FD661885 | Fructose-bisphosphate aldolase, chloroplast precursor | 0.05  | 0.05  | 0.13 | 0.13  |
| FD661886 | Hypothetical protein OsI_003067                       | 2.42  | 95.41 | 0.07 | 0.09  |
| FD661887 | Late embryogenesis abundant protein D-34              | 0.25  | 9.04  | 0.14 | 0.06  |
| FD661890 | Rice homologue of Tat binding protein                 | 3.20  | 5.06  | 1.28 | 8.25  |
| FD661892 | Salt tolerance protein 1                              | 0.51  | 2.05  | 1.62 | 1.62  |
| FD661893 | Anthocyanidin reductase                               | 0.67  | 1.73  | 0.50 | 1.25  |
| FD661894 | Phosphoenolpyruvate carboxylase                       | 0.24  | 0.13  | 0.34 | 0.29  |
| FD661895 | Photosystem I complex PsaH subunit precursor          | 0.60  | 0.02  | 0.19 | 0.13  |

|          |                                                            |       |       |       |       |
|----------|------------------------------------------------------------|-------|-------|-------|-------|
| FD661896 | G-box binding factor 3 (GBF3)                              | 45.90 | 76.41 | 0.64  | 1.91  |
| FD661897 | Non-specific lipid-transfer protein                        | 0.84  | 2.06  | 0.58  | 0.14  |
| FD661900 | Nuclear antigen                                            | 0.28  | 1.49  | 3.82  | 0.79  |
| FD661903 | Zinc finger (B-box type) family protein (ZF_2)             | 0.01  | 0.15  | 0.22  | 0.02  |
| FD661904 | Translation initiation factor eIF1                         | 0.79  | 5.85  | 1.28  | 0.21  |
| FD661907 | Putative cyanase                                           | 0.18  | 0.58  | 0.62  | 0.04  |
| FD661908 | Geranylgeranyl hydrogenase                                 | 0.08  | 0.04  | 4.17  | 0.12  |
| FD661909 | RNase S-like protein precursor                             | 16.11 | 1.66  | 74.14 | 0.13  |
| FD661910 | Proteasome subunit beta type 3                             | 0.43  | 2.17  | 0.76  | 0.45  |
| FD661912 | Fructose-bisphosphate aldolase, chloroplast precursor      | 0.02  | 0.04  | 0.26  | 0.01  |
| FD661914 | Extracellular matrix protein                               | 0.67  | 4.46  | 1.20  | 1.33  |
| FD661915 | Oxidoreductase                                             | 0.87  | 2.63  | 1.51  | 0.47  |
| FD661916 | Hypothetical protein OsI_023315                            | 0.24  | 0.51  | 2.55  | 0.01  |
| FD661917 | Heat shock protein 17.2                                    | 0.38  | 4.11  | 2.15  | 3.67  |
| FD661919 | Drought inducible 22 kDa protein                           | 12.80 | 21.19 | 0.39  | 0.21  |
| FD661920 | Predicted: similar to type X collagen                      | 0.39  | 2.01  | 2.25  | 0.21  |
| FD661922 | Chaperone                                                  | 0.57  | 4.43  | 0.48  | 0.28  |
| FD661923 | Chain A, Pyruvate Phosphate Dikinase                       | 0.07  | 0.09  | 0.34  | 0.11  |
| FD661924 | Asorbate peroxidase                                        | 0.99  | 4.97  | 1.85  | 0.26  |
| FD661925 | Heparan sulfate 6-O-sulfotransferase CG12249-PA, isoform A | 0.17  | 0.95  | 0.39  | 0.35  |
| FD661928 | Hypothetical protein OsI_024391                            | 0.93  | 18.83 | 1.46  | 0.24  |
| FD661929 | Sapoin-like type B, region 1 family protein                | 0.71  | 5.99  | 3.75  | 0.53  |
| FD661930 | Predicted proline-rich protein                             | 0.39  | 2.98  | 0.62  | 0.24  |
| FD661933 | Putative plastidic ATP/ADP transporter                     | 3.90  | 31.02 | 14.23 | 10.57 |
| FD661936 | Thioredoxin H                                              | 0.23  | 0.84  | 1.03  | 0.99  |
| FD661937 | Late embryogenesis abundant protein                        | 0.09  | 1.70  | 0.10  | 0.03  |
| FD661938 | Peptidylprolyl isomerase                                   | 0.16  | 0.69  | 0.79  | 0.30  |
| FD661940 | ATP-binding region, ATPase domain protein                  | 0.21  | 0.62  | 1.87  | 0.40  |
| FD661941 | Unknown protein                                            | 0.13  | 0.23  | 0.30  | 0.17  |
| FD661946 | ATP-binding region, ATPase domain protein                  | 0.15  | 1.07  | 0.72  | 0.11  |

\*The expression values were normalized to *EcActin* expression levels and the relative change in transcript levels compared to well-watered condition was calculated. The expression values between 0-1, 1.01-2, 2.01-5 and >5.01 are colored in yellow, blue, green and red, respectively.



Table S5: The expression targets of GBF3 predicted from a regulatory network (q vlaue  $\geq 0.001$ )

| Target    | Description                                                                 | Z Score |
|-----------|-----------------------------------------------------------------------------|---------|
| AT1G69260 | ABI FIVE BINDING PROTEIN (AFP1)                                             | 6.071   |
| AT3G29575 | ABI FIVE BINDING PROTEIN 3 (AFP3)                                           | 5.559   |
| AT1G75170 | Sec14p-like phosphatidylinositol transfer family protein                    | 5.539   |
| AT1G72770 | HYPERSENSITIVE TO ABA1 (HAB1)                                               | 5.225   |
| AT5G59220 | HIGHLY ABA-INDUCED PP2C GENE 1 (HAI1)                                       | 5.203   |
| AT2G40830 | RING-H2 FINGER C1A (RHC1A)                                                  | 4.772   |
| AT3G11420 | beta-1,3-N-acetylglucosaminyltransferase lunatic protein, putative (DUF604) | 4.753   |
| AT3G62260 | Protein phosphatase 2C family protein                                       | 4.661   |
| AT1G77450 | NAC DOMAIN CONTAINING PROTEIN 32 (NAC032)                                   | 4.626   |
| AT3G51890 | CLATHRIN LIGHT CHAIN 3 (CLC3)                                               | 4.608   |
| AT5G19875 | transmembrane protein                                                       | 4.517   |
| AT3G09910 | RAB GTPASE HOMOLOG C2B (RABC2b)                                             | 4.516   |
| AT5G57050 | ABA INSENSITIVE 2 (ABI2)                                                    | 4.474   |
| AT1G64660 | METHIONINE GAMMA-LYASE (MGL)                                                | 4.473   |
| AT4G31860 | Protein phosphatase 2C family protein                                       | 4.464   |
| AT2G26600 | Glycosyl hydrolase superfamily protein                                      | 4.45    |
| AT4G22820 | STRESS ASSOCIATED PROTEIN 9 (SAP9)                                          | 4.424   |
| AT5G24530 | DOWNY MILDEW RESISTANT 6 (DMR6)                                             | 4.415   |
| AT1G67360 | LD-ASSOCIATED PROTEIN 1 (LDAP1)                                             | 4.411   |
| AT1G04120 | ATP-BINDING CASSETTE C5 (ABCC5)                                             | 4.41    |
| AT1G01720 | NAC DOMAIN CONTAINING PROTEIN 32 (NAC032)                                   | 4.393   |
| AT3G20250 | PUMILIO 5 (PUM5)                                                            | 4.358   |
| AT1G07870 | Protein kinase superfamily protein                                          | 4.322   |
| AT3G12580 | HEAT SHOCK PROTEIN 70 (HSP70)                                               | 4.318   |
| AT5G42050 | DCD (Development and Cell Death) domain protein                             | 4.309   |
| AT5G11650 | alpha/beta-Hydrolases superfamily protein; MAGL13                           | 4.295   |
| AT1G22930 | T-complex protein 11                                                        | 4.28    |
| AT3G17800 | MEB5.2                                                                      | 4.268   |

|           |                                                           |       |
|-----------|-----------------------------------------------------------|-------|
| AT2G33590 | CCR(CINNAMOYL COA:NADP OXIDOREDUCTASE)-LIKE 1 (CRL1)      | 4.266 |
| AT4G29950 | Ypt/Rab-GAP domain of gyp1p superfamily protein           | 4.257 |
| AT2G37970 | SOUL-1                                                    | 4.254 |
| AT1G21080 | DNAJ heat shock N-terminal domain-containing protein      | 4.246 |
| AT1G05170 | Galactosyltransferase family protein                      | 4.229 |
| AT5G22000 | RING-H2 GROUP F2A (RHF2A)                                 | 4.228 |
| AT1G06570 | PHYTOENE DESATURATION 1 (PDS1)                            | 4.182 |
| AT3G52800 | A20/AN1-like zinc finger family protein                   | 4.175 |
| AT1G60190 | PLANT U-BOX 19 (PUB19)                                    | 4.166 |
| AT3G17000 | UBIQUITIN-CONJUGATING ENZYME 32 (UBC32)                   | 4.164 |
| AT5G06960 | OCS-ELEMENT BINDING FACTOR 5 (OBF5)                       | 4.157 |
| AT4G34000 | ABSCISIC ACID RESPONSIVE ELEMENTS-BINDING FACTOR 3 (ABF3) | 4.128 |
| AT5G07070 | CBL-INTERACTING PROTEIN KINASE 2 (CIPK2)                  | 4.112 |
| AT4G05050 | UBIQUITIN 11 (UBQ11)                                      | 4.098 |
| AT3G51000 | alpha/beta-Hydrolases superfamily protein                 | 4.097 |
| AT3G07700 | SALT-INDUCED ABC1 KINASE 1 (SIA1)                         | 4.096 |
| AT5G62570 | CALMODULIN-BINDING PROTEIN 60A (CBP60A)                   | 4.09  |
| AT3G04240 | SECRET AGENT (SEC)                                        | 4.055 |
| AT4G01280 | Homeodomain-like superfamily protein                      | 4.03  |
| AT3G23920 | BETA-AMYLASE 1 (BAM1)                                     | 4.019 |
| AT2G20560 | DNAJ heat shock family protein                            | 4.009 |
| AT1G68620 | alpha/beta-Hydrolases superfamily protein                 | 4.008 |
| AT4G17840 | FUNCTIONS IN: molecular_function unknown                  | 4.005 |
| AT1G79270 | EVOLUTIONARILY CONSERVED C-TERMINAL REGION 8 (ECT8)       | 4.005 |
| AT5G64930 | CONSTITUTIVE EXPRESSION OF PR GENES 5 (CPR5)              | 3.997 |
| AT5G04410 | NAC DOMAIN CONTAINING PROTEIN 2 (NAC2)                    | 3.983 |
| AT5G55860 | Plant protein of unknown function (DUF827)                | 3.976 |
| AT4G30490 | AFG1-like ATPase family protein                           | 3.965 |
| AT1G17440 | ENHANCED ETHYLENE RESPONSE 4 (EER4)                       | 3.958 |
| AT2G16720 | MYB DOMAIN PROTEIN 7 (MYB7)                               | 3.954 |
| AT3G54680 | proteophosphoglycan-related                               | 3.949 |

|           |                                                                                              |       |
|-----------|----------------------------------------------------------------------------------------------|-------|
| AT2G43320 | S-adenosyl-L-methionine-dependent methyltransferases superfamily protein                     | 3.927 |
| AT2G17220 | KINASE 3 (KIN3)                                                                              | 3.912 |
| AT1G75400 | RING/U-box superfamily protein                                                               | 3.911 |
| AT5G10740 | Protein phosphatase 2C family protein                                                        | 3.9   |
| AT3G57880 | Calcium-dependent lipid-binding (CaLB domain) plant phosphoribosyltransferase family protein | 3.887 |
| AT3G24500 | MULTIPROTEIN BRIDGING FACTOR 1C (MBF1C)                                                      | 3.886 |
| AT4G30470 | NAD(P)-binding Rossmann-fold superfamily protein                                             | 3.885 |
| AT3G24180 | Beta-glucosidase, GBA2 type family protein                                                   | 3.88  |
| AT2G46080 | BYPASS 2 (BPS2)                                                                              | 3.879 |
| AT4G34230 | CINNAMYL ALCOHOL DEHYDROGENASE 5 (CAD5)                                                      | 3.867 |
| AT3G01590 | Galactose mutarotase-like superfamily protein                                                | 3.865 |
| AT3G61890 | HOMEobox 12 (HB-12)                                                                          | 3.855 |
| AT3G06760 | Drought-responsive family protein                                                            | 3.844 |
| AT5G58720 | smr (Small MutS Related) domain-containing protein                                           | 3.843 |
| AT3G16940 | calmodulin binding                                                                           | 3.83  |
| AT5G54840 | (SGP1)                                                                                       | 3.83  |
| AT1G74310 | HEAT SHOCK PROTEIN 101 (HSP101)                                                              | 3.825 |
| AT1G70590 | F-box family protein                                                                         | 3.82  |
| AT4G02890 | (UBQ14)                                                                                      | 3.816 |
| AT1G03080 | NETWORKED 1D (NET1D)                                                                         | 3.815 |
| AT1G63840 | RING/U-box superfamily protein                                                               | 3.813 |
| AT3G53780 | RHOMBOID-LIKE PROTEIN 4 (RBL4)                                                               | 3.813 |
| AT2G35940 | BEL1-LIKE HOMEODOMAIN 1 (BLH1)                                                               | 3.811 |
| AT4G17530 | RAB GTPASE HOMOLOG 1C (RAB1C)                                                                | 3.809 |
| AT1G03290 | unknown protein                                                                              | 3.805 |
| AT5G22630 | AROGENATE DEHYDRATASE 5 (ADT5)                                                               | 3.805 |
| AT4G37790 | (HAT22)                                                                                      | 3.804 |
| AT5G01850 | Protein kinase superfamily protein                                                           | 3.799 |
| AT5G57910 | unknown protein                                                                              | 3.799 |
| AT5G53130 | CYCLIC NUCLEOTIDE GATED CHANNEL 1 (CNGC1)                                                    | 3.799 |
| AT1G67920 | unknown protein                                                                              | 3.785 |

|           |                                                                                  |       |
|-----------|----------------------------------------------------------------------------------|-------|
| AT1G30640 | Protein kinase family protein                                                    | 3.779 |
| AT3G53810 | L-TYPE LECTIN RECEPTOR KINASE IV.2 (LECRK-IV.2)                                  | 3.774 |
| AT5G37540 | Eukaryotic aspartyl protease family protein                                      | 3.77  |
| AT1G75810 | unknown protein                                                                  | 3.759 |
| AT4G38060 | CLAVATA COMPLEX INTERACTOR 2 (CCI2)                                              | 3.759 |
| AT3G19290 | ABRE BINDING FACTOR 4 (ABF4)                                                     | 3.755 |
| AT3G44100 | MD-2-related lipid recognition domain-containing protein                         | 3.754 |
| AT2G31350 | GLYOXALASE 2-5 (GLX2-5)                                                          | 3.754 |
| AT2G46680 | HOMEBOX 7 (HB-7)                                                                 | 3.747 |
| AT4G11350 | Protein of unknown function (DUF604)                                             | 3.736 |
| AT5G24870 | RING/U-box superfamily protein                                                   | 3.736 |
| AT1G32230 | RADICAL-INDUCED CELL DEATH1 (RCD1)                                               | 3.735 |
| AT5G64510 | TUNICAMYCIN INDUCED 1 (TIN1)                                                     | 3.725 |
| AT2G30550 | DAD1-LIKE LIPASE 3 (DALL3)                                                       | 3.723 |
| AT3G03310 | LECITHIN:CHOLESTEROL ACYLTRANSFERASE 3 (LCAT3)                                   | 3.714 |
| AT5G11970 | Protein of unknown function (DUF3511)                                            | 3.704 |
| AT1G55530 | RING/U-box superfamily protein                                                   | 3.699 |
| AT2G28400 | Protein of unknown function, DUF584                                              | 3.692 |
| AT3G63010 | GA INSENSITIVE DWARF1B (GID1B)                                                   | 3.686 |
| AT2G31130 | unknown protein                                                                  | 3.684 |
| AT1G26690 | emp24/gp25L/p24 family/GOLD family protein                                       | 3.682 |
| AT1G01550 | BYPASS 1 (BPS1)                                                                  | 3.678 |
| AT2G26170 | CYTOCHROME P450, FAMILY 711, SUBFAMILY A, POLYPEPTIDE 1 (CYP711A1)               | 3.678 |
| AT3G11410 | PROTEIN PHOSPHATASE 2CA (PP2CA)                                                  | 3.674 |
| AT5G07920 | DIACYLGLYCEROL KINASE1 (DGK1)                                                    | 3.673 |
| AT1G29330 | ENDOPLASMIC RETICULUM RETENTION DEFECTIVE 2 (ERD2)                               | 3.672 |
| AT3G08720 | SERINE/THREONINE PROTEIN KINASE 2 (S6K2)                                         | 3.672 |
| AT3G46450 | SEC14 cytosolic factor family protein / phosphoglyceride transfer family protein | 3.67  |
| AT5G52640 | HEAT SHOCK PROTEIN 90.1 (HSP90.1)                                                | 3.668 |
| AT5G11090 | serine-rich protein-related                                                      | 3.667 |
| AT2G30360 | SOS3-INTERACTING PROTEIN 4 (SIP4)                                                | 3.665 |

|           |                                                            |       |
|-----------|------------------------------------------------------------|-------|
| AT1G21450 | SCARECROW-LIKE 1 (SCL1)                                    | 3.664 |
| AT3G10250 | Plant protein 1589 of unknown function                     | 3.66  |
| AT5G46410 | SCP1-LIKE SMALL PHOSPHATASE 4 (SSP4)                       | 3.652 |
| AT5G35320 | unknown protein                                            | 3.65  |
| AT5G58380 | SOS3-INTERACTING PROTEIN 1 (SIP1)                          | 3.65  |
| AT2G24100 | ALTERED SEED GERMINATION 1 (ASG1)                          | 3.646 |
| AT2G40270 | Protein kinase family protein                              | 3.645 |
| AT1G49710 | FUCOSYLTRANSFERASE 12 (FUT12)                              | 3.645 |
| AT3G05830 | (ATNEAP1)                                                  | 3.641 |
| AT5G42990 | UBIQUITIN-CONJUGATING ENZYME 18 (UBC18)                    | 3.639 |
| AT2G46800 | ZINC TRANSPORTER OF ARABIDOPSIS THALIANA (ZAT)             | 3.637 |
| AT3G19580 | ZINC-FINGER PROTEIN 2 (ZF2)                                | 3.635 |
| AT1G67880 | beta-1,4-N-acetylglucosaminyltransferase family protein    | 3.632 |
| AT3G57530 | CALCIUM-DEPENDENT PROTEIN KINASE 32 (CPK32)                | 3.631 |
| AT2G47180 | GALACTINOL SYNTHASE 1 (GolS1)                              | 3.631 |
| AT5G23850 | FUNCTIONS IN: molecular_function unknown                   | 3.624 |
| AT5G58350 | WITH NO LYSINE (K) KINASE 4 (WNK4)                         | 3.624 |
| AT5G57900 | SKP1 INTERACTING PARTNER 1 (SKIP1)                         | 3.61  |
| AT2G44970 | alpha/beta-Hydrolases superfamily protein                  | 3.606 |
| AT1G09140 | SERINE/ARGININE-RICH PROTEIN SPLICING FACTOR 30 (SR30)     | 3.605 |
| AT1G76970 | Target of Myb protein 1                                    | 3.6   |
| AT5G53120 | SPERMIDINE SYNTHASE 3 (SPDS3)                              | 3.594 |
| AT5G45130 | RAB HOMOLOG 1 (RHA1)                                       | 3.592 |
| AT3G10800 | (BZIP28)                                                   | 3.591 |
| AT4G35110 | Arabidopsis phospholipase-like protein (PEARLI 4) family   | 3.59  |
| AT1G07350 | SERINE/ARGININE RICH-LIKE PROTEIN 45A (SR45a)              | 3.588 |
| AT3G15430 | Regulator of chromosome condensation (RCC1) family protein | 3.584 |
| AT2G29990 | ALTERNATIVE NAD(P)H DEHYDROGENASE 2 (NDA2)                 | 3.584 |
| AT4G05020 | NAD(P)H DEHYDROGENASE B2 (NDB2)                            | 3.58  |
| AT2G30490 | CINNAMATE-4-HYDROXYLASE (C4H)                              | 3.578 |
| AT2G34730 | myosin heavy chain-related                                 | 3.574 |

|           |                                                                                            |       |
|-----------|--------------------------------------------------------------------------------------------|-------|
| AT5G22290 | NAC DOMAIN CONTAINING PROTEIN 89 (NAC089)                                                  | 3.574 |
| AT5G61820 | FUNCTIONS IN: molecular_function unknown                                                   | 3.573 |
| AT1G80820 | CINNAMOYL COA REDUCTASE (CCR2)                                                             | 3.572 |
| AT5G16830 | SYNTAXIN OF PLANTS 21 (SYP21)                                                              | 3.57  |
| AT2G21940 | SHIKIMATE KINASE 1 (SK1)                                                                   | 3.56  |
| AT1G31130 | unknown protein                                                                            | 3.559 |
| AT1G48320 | DHNA-COA THIOESTERASE 1 (DHNAT1)                                                           | 3.559 |
| AT4G27780 | ACYL-COA BINDING PROTEIN 2 (ACBP2)                                                         | 3.554 |
| AT5G47120 | BAX INHIBITOR 1 (BI1)                                                                      | 3.553 |
| AT3G03790 | ankyrin repeat family protein / regulator of chromosome condensation (RCC1) family protein | 3.551 |
| AT5G52530 | dentin sialophosphoprotein-related                                                         | 3.55  |
| AT1G01650 | SIGNAL PEPTIDE PEPTIDASE-LIKE 4 (SPPL4)                                                    | 3.545 |
| AT3G57540 | REMORIN GROUP 4 1 (REM4.1)                                                                 | 3.544 |
| AT1G76040 | CALCIUM-DEPENDENT PROTEIN KINASE 29 (CPK29)                                                | 3.543 |
| AT4G37460 | SUPPRESSOR OF RPS4-RLD 1 (SRFR1)                                                           | 3.542 |
| AT1G52080 | (AR791)                                                                                    | 3.538 |
| AT1G32870 | NAC DOMAIN PROTEIN 13 (NAC13)                                                              | 3.529 |
| AT3G56310 | Melibiose family protein                                                                   | 3.527 |
| AT3G16990 | Haem oxygenase-like, multi-helical                                                         | 3.526 |
| AT1G61660 | (ATBHLH112)                                                                                | 3.524 |
| AT4G12400 | HOP3 (Hop3)                                                                                | 3.521 |
| AT2G33380 | RESPONSIVE TO DESICCATION 20 (RD20)                                                        | 3.52  |
| AT1G74360 | Leucine-rich repeat protein kinase family protein                                          | 3.518 |
| AT2G46500 | PHOSPHOINOSITIDE 4-KINASE GAMMA 4 (PI4K GAMMA 4)                                           | 3.514 |
| AT4G23630 | VIRB2-INTERACTING PROTEIN 1 (BT11)                                                         | 3.511 |
| AT1G17550 | HOMOLOGY TO ABI2 (HAB2)                                                                    | 3.508 |
| AT5G16880 | Target of Myb protein 1                                                                    | 3.503 |
| AT3G05210 | (ERCC1)                                                                                    | 3.503 |
| AT4G14220 | RING-H2 GROUP F1A (RHF1A)                                                                  | 3.503 |
| AT1G09070 | SOYBEAN GENE REGULATED BY COLD-2 (SRC2)                                                    | 3.501 |
| AT5G62020 | HEAT SHOCK TRANSCRIPTION FACTOR B2A (HSFB2A)                                               | 3.5   |

|           |                                                              |       |
|-----------|--------------------------------------------------------------|-------|
| AT5G54870 | unknown protein                                              | 3.499 |
| AT5G03490 | UDP GLYCOSYLTRANSFERASE 89A2 (UGT89A2)                       | 3.497 |
| AT1G23440 | Peptidase C15, pyroglutamyl peptidase I-like                 | 3.496 |
| AT5G24810 | ABC1 family protein                                          | 3.493 |
| AT4G28390 | ADP/ATP CARRIER 3 (AAC3)                                     | 3.492 |
| AT5G13820 | TELOMERIC DNA BINDING PROTEIN 1 (TBP1)                       | 3.489 |
| AT4G30210 | P450 REDUCTASE 2 (ATR2)                                      | 3.487 |
| AT1G80610 | unknown protein                                              | 3.481 |
| AT4G34150 | Calcium-dependent lipid-binding (CaLB domain) family protein | 3.481 |
| AT1G64060 | RESPIRATORY BURST OXIDASE PROTEIN F (RBOH F)                 | 3.476 |
| AT5G09620 | Octicosapeptide/Phox/Bem1p family protein                    | 3.47  |
| AT1G56660 | unknown protein                                              | 3.469 |
| AT3G12740 | ALA-INTERACTING SUBUNIT 1 (ALIS1)                            | 3.469 |
| AT3G55640 | Mitochondrial substrate carrier family protein               | 3.464 |
| AT5G11110 | SUCROSE PHOSPHATE SYNTHASE 2F (SPS2F)                        | 3.461 |
| AT5G13200 | GEM-RELATED 5 (GER5)                                         | 3.458 |
| AT4G21580 | oxidoreductase, zinc-binding dehydrogenase family protein    | 3.457 |
| AT4G24100 | Protein kinase superfamily protein                           | 3.455 |
| AT1G42990 | BASIC REGION/LEUCINE ZIPPER MOTIF 60 (BZIP60)                | 3.454 |
| AT5G12030 | HEAT SHOCK PROTEIN 17.6A (HSP17.6A)                          | 3.448 |
| AT2G37760 | ALDO-KETO REDUCTASE FAMILY 4 MEMBER C8 (AKR4C8)              | 3.444 |
| AT4G16760 | ACYL-COA OXIDASE 1 (ACX1)                                    | 3.44  |
| AT5G45410 | unknown protein                                              | 3.435 |
| AT1G23040 | hydroxyproline-rich glycoprotein family protein              | 3.434 |
| AT1G69610 | FUNCTIONS IN: structural constituent of ribosome             | 3.434 |
| AT2G41190 | Transmembrane amino acid transporter family protein          | 3.434 |
| AT4G23850 | LONG-CHAIN ACYL-COA SYNTHETASE 4 (LACS4)                     | 3.434 |
| AT5G56980 | unknown protein                                              | 3.43  |
| AT2G33580 | LYSM-CONTAINING RECEPTOR-LIKE KINASE 5 (LYK5)                | 3.426 |
| AT4G29330 | DERLIN-1 (DER1)                                              | 3.424 |
| AT4G00500 | alpha/beta-Hydrolases superfamily protein                    | 3.423 |

|           |                                                                                                            |       |
|-----------|------------------------------------------------------------------------------------------------------------|-------|
| AT2G27580 | STRESS ASSOCIATED PROTEIN3 (SAP3)                                                                          | 3.423 |
| AT4G29160 | (SNF7.1)                                                                                                   | 3.416 |
| AT1G55110 | INDETERMINATE(ID)-DOMAIN 7 (IDD7)                                                                          | 3.413 |
| AT5G21090 | Leucine-rich repeat (LRR) family protein                                                                   | 3.409 |
| AT1G68910 | WPP DOMAIN-INTERACTING PROTEIN 2 (WIT2)                                                                    | 3.408 |
| AT5G15860 | PRENYLCYSTEINE METHYLESTERASE (PCME)                                                                       | 3.407 |
| AT5G63370 | CYCLIN-DEPENDENT KINASE G1 (CDKG1)                                                                         | 3.395 |
| AT4G34390 | EXTRA-LARGE GTP-BINDING PROTEIN 2 (XLG2)                                                                   | 3.393 |
| AT5G54110 | MEMBRANE-ASSOCIATED MANNITOL-INDUCED (MAMI)                                                                | 3.392 |
| AT5G51070 | EARLY RESPONSIVE TO DEHYDRATION 1 (ERD1)                                                                   | 3.391 |
| AT1G21000 | PLATZ transcription factor family protein                                                                  | 3.389 |
| AT4G23570 | (SGT1A)                                                                                                    | 3.388 |
| AT4G26080 | ABA INSENSITIVE 1 (ABI1)                                                                                   | 3.388 |
| AT4G23050 | PAS domain-containing protein tyrosine kinase family protein                                               | 3.386 |
| AT1G25370 | Protein of unknown function (DUF1639)                                                                      | 3.381 |
| AT2G18090 | PHD finger family protein / SWIB complex BAF60b domain-containing protein / GYF domain-containing protein  | 3.376 |
| AT3G52120 | SWAP (Suppressor-of-White-APricot)/surp domain-containing protein / D111/G-patch domain-containing protein | 3.376 |
| AT4G02280 | SUCROSE SYNTHASE 3 (SUS3)                                                                                  | 3.375 |
| AT5G18040 | HEAT-INDUCED TAS1 TARGET 2 (HTT2)                                                                          | 3.373 |
| AT1G15110 | PHOSPHATIDYLSERINE SYNTHASE 1 (PSS1)                                                                       | 3.37  |
| AT2G46150 | Late embryogenesis abundant (LEA) hydroxyproline-rich glycoprotein family                                  | 3.369 |
| AT3G07090 | PPPDE putative thiol peptidase family protein                                                              | 3.359 |
| AT1G12580 | PHOSPHOENOLPYRUVATE CARBOXYLASE-RELATED KINASE 1 (PEPKR1)                                                  | 3.355 |
| AT5G45710 | ROOT HANDEDNESS 1 (RHA1)                                                                                   | 3.355 |
| AT2G45910 | U-box domain-containing protein kinase family protein                                                      | 3.353 |
| AT2G29450 | GLUTATHIONE S-TRANSFERASE TAU 5 (GSTU5)                                                                    | 3.352 |
| AT4G13180 | NAD(P)-binding Rossmann-fold superfamily protein                                                           | 3.349 |
| AT1G45145 | THIOREDOXIN H-TYPE 5 (TRX5)                                                                                | 3.348 |
| AT4G21940 | CALCIUM-DEPENDENT PROTEIN KINASE 15 (CPK15)                                                                | 3.345 |
| AT4G34480 | O-Glycosyl hydrolases family 17 protein                                                                    | 3.344 |
| AT2G37710 | L-TYPE LECTIN RECEPTOR KINASE IV.1 (LECRK-IV.1)                                                            | 3.344 |



|           |                                                                                                                                   |       |
|-----------|-----------------------------------------------------------------------------------------------------------------------------------|-------|
| AT1G67310 | Calmodulin-binding transcription activator protein with CG-1 and Ankyrin domains                                                  | 3.343 |
| AT5G64250 | Aldolase-type TIM barrel family protein                                                                                           | 3.342 |
| AT2G04350 | LONG-CHAIN ACYL-COA SYNTHETASE 8 (LACS8)                                                                                          | 3.34  |
| AT3G51440 | Calcium-dependent phosphotriesterase superfamily protein                                                                          | 3.334 |
| AT4G11800 | Calcineurin-like metallo-phosphoesterase superfamily protein                                                                      | 3.33  |
| AT5G04830 | Nuclear transport factor 2 (NTF2) family protein                                                                                  | 3.328 |
| AT1G54100 | ALDEHYDE DEHYDROGENASE 7B4 (ALDH7B4)                                                                                              | 3.327 |
| AT3G05580 | TYPE ONE PROTEIN PHOSPHATASE 9 (TOPP9)                                                                                            | 3.326 |
| AT5G63130 | Octicosapeptide/Phox/Bem1p family protein                                                                                         | 3.325 |
| AT2G02390 | GLUTATHIONE S-TRANSFERASE ZETA 1 (GSTZ1)                                                                                          | 3.322 |
| AT3G58640 | Mitogen activated protein kinase kinase kinase-related                                                                            | 3.321 |
| AT3G02140 | TWO OR MORE ABRES-CONTAINING GENE 2 (TMAC2)                                                                                       | 3.319 |
| AT3G44110 | (J3)                                                                                                                              | 3.314 |
| AT5G26770 | (ATNEAP2)                                                                                                                         | 3.312 |
| AT4G27350 | Protein of unknown function (DUF1223)                                                                                             | 3.307 |
| AT3G19240 | Vacuolar import/degradation, Vid27-related protein                                                                                | 3.303 |
| AT5G65280 | GCR2-LIKE 1 (GCL1)                                                                                                                | 3.301 |
| AT4G31170 | Protein kinase superfamily protein                                                                                                | 3.298 |
| AT4G28300 | Encodes a protein with 13.6% proline amino acids that is predicted to localize to the cell wall. The mRNA is cell-to-cell mobile. | 3.292 |
| AT5G63790 | NAC DOMAIN CONTAINING PROTEIN 102 (NAC102)                                                                                        | 3.289 |
| AT5G13160 | AVRPPHB SUSCEPTIBLE 1 (PBS1)                                                                                                      | 3.288 |
| AT2G33700 | PROTEIN PHOSPHATASE 2C G GROUP 1 (PP2CG1)                                                                                         | 3.285 |
| AT2G30140 | UDP-GLUCOSYL TRANSFERASE 87A2 (UGT87A2)                                                                                           | 3.285 |
| AT3G59770 | SUPPRESSOR OF ACTIN 9 (SAC9)                                                                                                      | 3.284 |
| AT3G28450 | BAK1-INTERACTING RECEPTOR-LIKE KINASE 2 (BIR2)                                                                                    | 3.282 |
| AT4G22740 | glycine-rich protein                                                                                                              | 3.281 |
| AT4G11220 | VIRB2-INTERACTING PROTEIN 2 (BTI2)                                                                                                | 3.28  |
| AT1G66880 | Protein kinase superfamily protein                                                                                                | 3.275 |
| AT5G06750 | ARABIDOPSIS PP2C CLADE D 8 (APD8)                                                                                                 | 3.274 |
| AT5G02020 | SALT INDUCED SERINE RICH (SIS)                                                                                                    | 3.274 |
| AT5G41350 | RING/U-box superfamily protein                                                                                                    | 3.266 |

|           |                                                                    |       |
|-----------|--------------------------------------------------------------------|-------|
| AT1G16670 | Protein kinase superfamily protein                                 | 3.265 |
| AT2G45920 | U-box domain-containing protein                                    | 3.263 |
| AT3G10420 | SEEDLING PLASTID DEVELOPMENT 1 (SPD1)                              | 3.263 |
| AT5G35460 | unknown protein                                                    | 3.26  |
| AT3G46930 | RAF-LIKE MITOGEN-ACTIVATED PROTEIN KINASE KINASE KINASE 43 (RAF43) | 3.258 |
| AT3G12350 | F-box family protein                                               | 3.256 |
| AT5G66620 | DA1-RELATED PROTEIN 6 (DAR6)                                       | 3.255 |
| AT3G63500 | TITANIA 2 (TTA2)                                                   | 3.252 |
| AT3G59090 | CANDIDATE G-PROTEIN COUPLED RECEPTOR 3 (CAND3)                     | 3.251 |
| AT5G25770 | alpha/beta-Hydrolases superfamily protein                          | 3.25  |
| AT1G49050 | (APCB1)                                                            | 3.247 |
| AT5G42810 | INOSITOL-PENTAKISPHOSPHATE 2-KINASE 1 (IPK1)                       | 3.242 |
| AT1G69490 | NAC-LIKE, ACTIVATED BY AP3/PI (NAP)                                | 3.239 |
| AT3G14200 | Chaperone DnaJ-domain superfamily protein                          | 3.236 |
| AT2G45500 | AAA-type ATPase family protein                                     | 3.234 |
| AT4G12020 | (WRKY19)                                                           | 3.233 |
| AT5G54940 | Translation initiation factor SUI1 family protein                  | 3.231 |
| AT1G05340 | unknown protein                                                    | 3.229 |
| AT2G01600 | ENTH/ANTH/VHS superfamily protein                                  | 3.229 |
| AT2G21820 | unknown protein                                                    | 3.228 |
| AT5G12010 | unknown protein                                                    | 3.228 |
| AT5G52070 | Agenet domain-containing protein                                   | 3.228 |
| AT4G27657 | unknown protein                                                    | 3.224 |
| AT5G43100 | Eukaryotic aspartyl protease family protein                        | 3.221 |
| AT5G61510 | GroES-like zinc-binding alcohol dehydrogenase family protein       | 3.219 |
| AT1G12360 | KEULE (KEU)                                                        | 3.216 |
| AT2G30500 | NETWORKED 4B (NET4B)                                               | 3.213 |
| AT2G31990 | Exostosin family protein                                           | 3.21  |
| AT3G55960 | Haloacid dehalogenase-like hydrolase (HAD) superfamily protein     | 3.21  |
| AT1G66340 | ETHYLENE RESPONSE 1 (ETR1)                                         | 3.208 |
| AT3G15760 | unknown protein                                                    | 3.207 |

|           |                                                                         |       |
|-----------|-------------------------------------------------------------------------|-------|
| AT4G32160 | Phox (PX) domain-containing protein                                     | 3.202 |
| AT3G26000 | RCAR3 INTERACTING F-BOX PROTEIN 1 (RIFP1)                               | 3.194 |
| AT4G11660 | (AT-HSFB2B)                                                             | 3.192 |
| AT1G68440 | unknown protein                                                         | 3.191 |
| AT4G33910 | 2-oxoglutarate (2OG) and Fe(II)-dependent oxygenase superfamily protein | 3.189 |
| AT4G33240 | FORMS APLOID AND BINUCLEATE CELLS 1A (FAB1A)                            | 3.186 |
| AT4G32870 | Polyketide cyclase/dehydrase and lipid transport superfamily protein    | 3.185 |
| AT5G24120 | SIGMA FACTOR E (SIGE)                                                   | 3.182 |
| AT4G18140 | SCP1-LIKE SMALL PHOSPHATASE 4B (SSP4b)                                  | 3.178 |
| AT3G03740 | BTB-POZ AND MATH DOMAIN 4 (BPM4)                                        | 3.177 |
| AT1G58360 | AMINO ACID PERMEASE 1 (AAP1)                                            | 3.176 |
| AT1G32700 | PLATZ transcription factor family protein                               | 3.175 |
| AT4G05320 | POLYUBIQUITIN 10 (UBQ10)                                                | 3.174 |
| AT1G45976 | S-RIBONUCLEASE BINDING PROTEIN 1 (SBP1)                                 | 3.174 |
| AT3G12360 | INCREASED TOLERANCE TO NAACL (ITN1)                                     | 3.17  |
| AT1G68300 | Adenine nucleotide alpha hydrolases-like superfamily protein            | 3.169 |
| AT2G38410 | ENTH/VHS/GAT family protein                                             | 3.168 |
| AT1G73080 | PEP1 RECEPTOR 1 (PEPR1)                                                 | 3.168 |
| AT5G44090 | Calcium-binding EF-hand family protein                                  | 3.165 |
| AT2G42010 | PHOSPHOLIPASE D BETA 1 (PLDBETA1)                                       | 3.165 |
| AT4G22980 | FUNCTIONS IN: molecular_function unknown                                | 3.164 |
| AT5G58940 | CALMODULIN-BINDING RECEPTOR-LIKE CYTOPLASMIC KINASE 1 (CRCK1)           | 3.163 |
| AT5G39660 | CYCLING DOF FACTOR 2 (CDF2)                                             | 3.163 |
| AT5G24590 | TCV-INTERACTING PROTEIN (TIP)                                           | 3.162 |
| AT5G01670 | NAD(P)-linked oxidoreductase superfamily protein                        | 3.158 |
| AT5G04720 | ADR1-LIKE 2 (ADR1-L2)                                                   | 3.154 |
| AT1G17230 | Leucine-rich receptor-like protein kinase family protein                | 3.152 |
| AT1G07630 | POL-LIKE 5 (PLL5)                                                       | 3.152 |
| AT4G01070 | (GT72B1)                                                                | 3.15  |
| AT2G17520 | (IRE1A)                                                                 | 3.149 |
| AT1G69270 | RECEPTOR-LIKE PROTEIN KINASE 1 (RPK1)                                   | 3.149 |

|           |                                                                             |       |
|-----------|-----------------------------------------------------------------------------|-------|
| AT3G51370 | Protein phosphatase 2C family protein                                       | 3.148 |
| AT2G27150 | ABSCISIC ALDEHYDE OXIDASE 3 (AAO3)                                          | 3.148 |
| AT4G19640 | (ARA7)                                                                      | 3.147 |
| AT2G46940 | unknown protein                                                             | 3.145 |
| AT5G19240 | Glycoprotein membrane precursor GPI-anchored                                | 3.144 |
| AT5G60360 | ALEURAIN-LIKE PROTEASE (ALP)                                                | 3.144 |
| AT5G07270 | XB3 ORTHOLOG 3 IN ARABIDOPSIS THALIANA (XBAT33)                             | 3.144 |
| AT2G25520 | Drug/metabolite transporter superfamily protein                             | 3.143 |
| AT4G02410 | L-TYPE LECTIN RECEPTOR KINASE IV.3 (LECRK-IV.3)                             | 3.137 |
| AT1G77280 | Protein kinase protein with adenine nucleotide alpha hydrolases-like domain | 3.135 |
| AT5G53970 | TYROSINE AMINOTRANSFERASE 7 (TAT7)                                          | 3.135 |
| AT4G22920 | NON-YELLOWING 1 (NYE1)                                                      | 3.134 |
| AT3G51250 | Senescence/dehydration-associated protein-related                           | 3.133 |
| AT3G44720 | AROGENATE DEHYDRATASE 4 (ADT4)                                              | 3.133 |
| AT3G51860 | CATION EXCHANGER 3 (CAX3)                                                   | 3.132 |
| AT2G19710 | IST1-LIKE 5 (ISTL5)                                                         | 3.132 |
| AT5G53220 | unknown protein                                                             | 3.131 |
| AT4G24400 | CBL-INTERACTING PROTEIN KINASE 8 (CIPK8)                                    | 3.13  |
| AT1G50260 | N-TERMINAL-TRANSMEMBRANE-C2 DOMAIN TYPE 5.1 (NTMC2T5.1)                     | 3.126 |
| AT4G15530 | PYRUVATE ORTHOPHOSPHATE DIKINASE (PPDK)                                     | 3.123 |
| AT1G71697 | CHOLINE KINASE 1 (CK1)                                                      | 3.12  |
| AT1G61140 | EMBRYO SAC DEVELOPMENT ARREST 16 (EDA16)                                    | 3.12  |
| AT5G02620 | ANKYRIN-LIKE1 (ANK1)                                                        | 3.119 |
| AT1G34750 | Protein phosphatase 2C family protein                                       | 3.118 |
| AT5G52580 | RabGAP/TBC domain-containing protein                                        | 3.117 |
| AT3G44630 | Disease resistance protein (TIR-NBS-LRR class) family                       | 3.116 |
| AT3G14440 | NINE-CIS-EPOXYCAROTENOID DIOXYGENASE 3 (NCED3)                              | 3.115 |
| AT4G02200 | Drought-responsive family protein                                           | 3.113 |
| AT3G51130 | unknown protein                                                             | 3.112 |
| AT4G32020 | unknown protein                                                             | 3.112 |
| AT3G46230 | HEAT SHOCK PROTEIN 17.4 (HSP17.4)                                           | 3.104 |

|           |                                                       |       |
|-----------|-------------------------------------------------------|-------|
| AT1G31540 | Disease resistance protein (TIR-NBS-LRR class) family | 3.102 |
| AT3G61630 | CYTOKININ RESPONSE FACTOR 6 (CRF6)                    | 3.101 |
| AT5G54730 | HOMOLOG OF YEAST AUTOPHAGY 18 (ATG18) F (G18F)        | 3.096 |
| AT4G19140 | unknown protein                                       | 3.095 |

## Supplementary methods

### Subtracted drought stress cDNA library construction in finger millet

For drought stress cDNA library construction, finger millet plants were grown in pots filled with mixture of red soil, sand and farmyard manure at 3:1:1 ratio in a rainout shelter facility under natural vapor pressure deficit of approximately 4 kPa and natural light conditions. Drought stress was applied on 25 days old plants by gradually withholding water and monitoring soil water status by gravimetric method<sup>1-3</sup>.

Gravimetric method involves determination and regulation of soil moisture content on the basis of mass. Pots were filled with equal weight of soil and fresh weight (FW), saturated weight (SW) and dry weight (DW) were determined. FW of the soil was calculated as (FW of soil + pot weight)-(pot weight). SW of the soil was determined as (weight of soil flooded with water and drained overnight + pot weight)-(pot weight). DW of the soil was determined as (oven DW of soil + pot weight)-(pot weight). Soil moisture content at 100% field capacity (FC) was determined as  $[(FW-DW)/(SW-DW)] \times 100$ . A batch of plants were maintained at 100% FC as control and soil moisture content for other drought stress levels was calculated based on 100% FC. Drought stress was applied by gradually reducing the soil water content to achieve desired stress levels by weighing the pots at 10 am every day. Sets of plants which reached 80% and 60% FC were maintained at that level by replenishing the water lost through evapotranspiration until plants designated for severe stress reached 35% FC. Further, plants at all stress levels were maintained at designated FC for 5 more days and leaf samples were collected. At the end of stress period, second and third fully expanded leaves were harvested from drought stressed and control plants, and used for cDNA library preparation and RT-qPCR analysis. Another set of drought stressed plants were re-watered and tissue was harvested at 6 h of recovery. Recovery samples were used only for RT-qPCR analysis.

Total RNA was isolated from control (100% FC) and drought stressed (80%, 60% and 35% FC) samples. Poly(A)+ RNA was purified by magnetic separation after annealing it to 5'-biotinylated oligo-dT(18) primer and subsequently immobilized onto streptavidin-linked paramagnetic beads. First-strand cDNA was synthesized from 5 µg of poly(A)+

RNA from control sample using 5'-biotinylated oligo-dT (T(18)VN) primer and SuperScript® II Reverse Transcriptase (Invitrogen Corporation, Carlsbad, CA, USA) following the manufacturer's protocol. One microgram of poly(A)+ RNA from pooled drought stress samples (tester) was mixed with 5-fold excess of 5'-biotinylated first-strand cDNA population of control sample (driver) and hybridized for 4 h at 68°C in 50 µl of RNase free hybridization buffer (10 mM Tris-HCl pH 7.5, 0.5 M KCl and 5 mM EDTA). The poly(A)+ RNA-cDNA hybrids and excess cDNA population were immobilized onto streptavidin beads. The beads were separated under magnetic field and the supernatant was transferred to a new tube. The unbound differentially expressed poly(A)+ RNA was precipitated with two volumes of absolute ethanol. The subtracted poly(A)+ RNA was used to synthesize double strand cDNA and uni-directionally ligated into Uni-ZAP XR vector, *in vitro* packaged and infected to XL1-Blue MRF *Escherichia coli* cells using a Uni-ZAP XR cDNA library construction kit (Stratagene, La Jolla, CA, USA), according to the manufacturer's instructions. The individual recombinant plaques from the cDNA library were transferred into tubes containing 200 µl of SM buffer (100 mM NaCl, 8 mM MgSO<sub>4</sub>·7H<sub>2</sub>O, 50 mM Tris-HCl pH 7, 0.04% gelatin). They were verified by PCR using M13 primers (Supplementary Table S1) with 1 µl of recombinant phage suspension as a template in 50 µl of PCR reaction mix (94°C for 1 min, 55°C for 1 min and 72°C for 2 min, for 30 cycles). PCR-amplified cDNA inserts were purified using PCR purification kit (Qiagen, Valencia, CA, USA) and used as template for sequencing. The sequences were annotated to assign putative functions via BLASTX non-redundant protein sequence database search. After removing the vector backbone sequence, the processed sequences were submitted to dbEST database at NCBI (Supplementary Table S3).

### **Gene expression analysis in finger millet**

Total RNA was extracted from leaf tissue using RNeasy Plant Mini Kit (QIAGEN Inc. Valencia, CA, USA). First-strand cDNA was synthesized from 2 µg of total RNA with SuperScript™ III first-strand synthesis system (Invitrogen™ life technologies, Grand Island, NY, USA) and used as a template for RT-qPCR and semi-quantitative RT-PCR analysis. Equal dilution of cDNA was used for RT-qPCR analysis with gene specific

primers (Supplementary Table S1). RT-qPCR was performed using SYBR<sup>®</sup> Green real-time PCR master mix (Invitrogen<sup>™</sup> life technologies, Grand Island, NY, USA) on Real-Time PCR detection system (Bio-Rad Life Science Research, Hercules, CA, USA) as per the manufacturer recommended protocol. The experiment was repeated using different batch of cDNA preparation in another machine (ABI PRISM 5700, Applied Biosystems, Bedford, MA, USA). The average Ct values of two biological replicates and three technical replicates were used for analysis. The data was normalized with the *EcActin1* (GenBank accession number HE800188) and fold change in expression under a given drought stress level compared to control was calculated using the  $2^{-\Delta\Delta Ct}$  method<sup>4,5</sup>.

### **Full-length cloning of *EcGBF3***

RNA ligase-mediated rapid amplification of cDNA ends (RLM-RACE) was performed using the GeneRacer kit (Invitrogen Corporation, Carlsbad, CA, USA) according to the manufacturer's instructions to isolate 5' and 3' regions of truncated *EcGBF3* gene from finger millet. The 5' region was amplified using the 5' GeneRacer primer and gene specific reverse primer, and 3' region was amplified using the 3' GeneRacer primer and forward gene specific primer which were designed to leave an overlapping sequence at both 5' and 3' ends of truncated *EcGBF3* gene (Supplementary Table S1). Full-length *EcGBF3* gene was confirmed by sequencing and alignment to the orthologous sequences from other plant species.

### **Abiotic stress assays on MS medium**

One week old hygromycin resistant T<sub>3</sub> generation plants from three lines per construct were used for stress experiments. Seedlings were transferred on to half strength MS medium (0.5% sucrose and 0.1% phytigel) supplemented with 100 mM mannitol, 100 mM NaCl or 3  $\mu$ M ABA. Instead of agar, lower concentration of phytigel was used as a solidifying agent for easy uprooting of seedlings from the plates. Plants were carefully uprooted from the media, blotted on paper towel to remove any media and used for root length and biomass measurements. Student's *t* test was used to assess the statistical



significance of the differences in the means of *Atgbf3* mutant or transgenic plants from Col-0 plants.

## References

- 1 Ramegowda, V. *et al.* Expression of a finger millet transcription factor, EcNAC1, in tobacco confers abiotic stress-tolerance. *PLoS One* **7**, e40397, doi:10.1371/journal.pone.0040397 (2012).
- 2 Karaba, A. *et al.* Improvement of water use efficiency in rice by expression of HARDY, an *Arabidopsis* drought and salt tolerance gene. *Proceedings of the National Academy of Sciences* **104**, 15270-15275, doi:10.1073/pnas.0707294104 (2007).
- 3 Kathuria, H. *et al.* Glycinebetaine-induced water-stress tolerance in *codA*-expressing transgenic indica rice is associated with up-regulation of several stress responsive genes. *Plant biotechnology journal* **7**, 512-526 (2009).
- 4 Livak, K. J. & Schmittgen, T. D. Analysis of Relative Gene Expression Data Using Real-Time Quantitative PCR and the  $2^{-\Delta\Delta CT}$  Method. *Methods* **25**, 402-408, doi:<http://dx.doi.org/10.1006/meth.2001.1262> (2001).
- 5 Schmittgen, T. D. & Livak, K. J. Analyzing real-time PCR data by the comparative CT method. *Nature Protocols* **3**, 1101-1108 (2008).
